# Supplementary material for: Identification of acetaldehyde based on plasmonic patterns of a gold nanostructure conjugated with chromophore and H2O2: a new platform for the rapid and low-cost analysis of carcinogenic agents by colorimetric affordable test strip (CATS)
Source: Royal Society of Chemistry journal article supplement (doi:10.1039/d4ra02814g), 2024-01-01
Supplement: d4ra02814g3.pdf [file d4ra02814g3.pdf]

## Supporting information

### **Identification of acetaldehyde based on plasmonic patterns of gold nanostructure conjugated with chromophore and H<sub>2</sub>O<sub>2</sub>: A new platform for the rapid and low-cost analysis of carcinogenic agents by colorimetric affordable test strip (CATS)**

Fatemeh Farshchi <sup>a</sup>, Arezoo Saadati <sup>b,1</sup>, Farnaz Bahavarnia <sup>c</sup>, Mohammad Hasanzadeh <sup>d,\*</sup>, Nasrin Shadjou <sup>e</sup>

<sup>a</sup> Fundação Oswaldo Cruz, Instituto Oswaldo Cruz, Laboratório de Biologia Molecular e Doenças Endêmicas, Avenida Brasil No 4365-Manguinhos, Rio de Janeiro 21040-900, RJ, Brazil.

<sup>b</sup> Central European Institute of Technology, Brno University of Technology, Brno CZ-612 00, Czech Republic.

<sup>c</sup> Nutrition Research Center, Tabriz University of Medical Sciences, Tabriz, Iran.

<sup>d</sup> Pharmaceutical Analysis Research Center, Tabriz University of Medical Sciences, Tabriz, Iran.

<sup>e</sup> Department of Nanotechnology, Faculty of Science and Chemistry, Urmia University, Urmia, Iran.

Corresponding Author

\* (Mohammad Hasanzadeh) Pharmaceutical Analysis Research Center, Tabriz University of Medical Sciences, Tabriz, Iran.

E-mail address: (\*) [hasanzadehm@tbzmed.ac.ir](mailto:hasanzadehm@tbzmed.ac.ir)

<sup>1</sup> Co-first author.

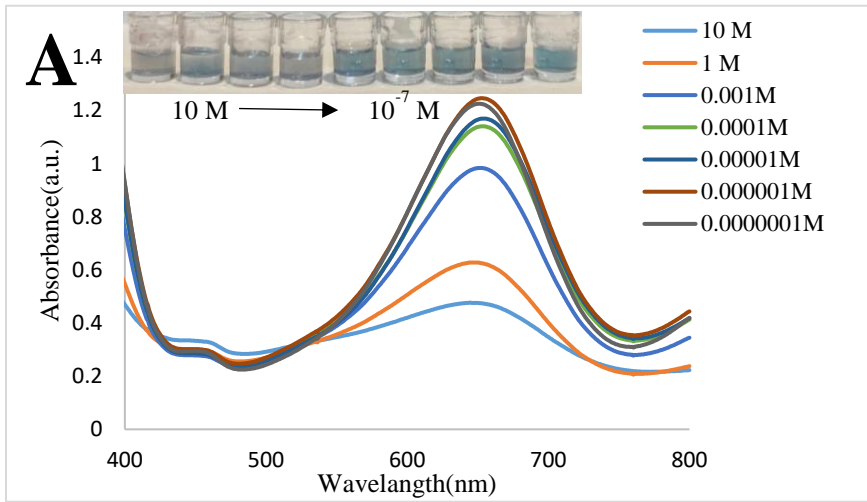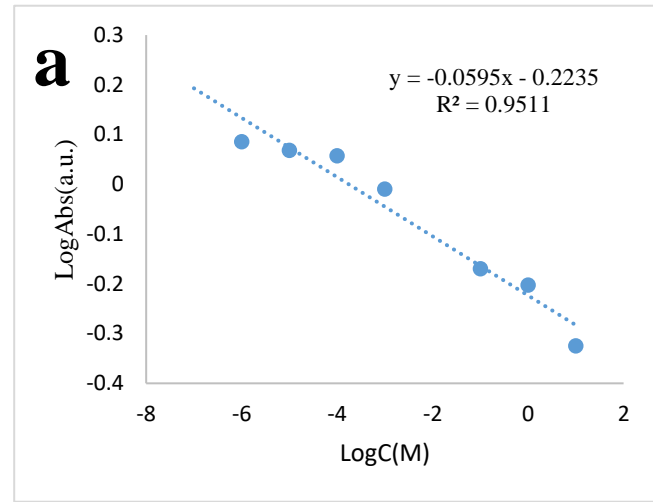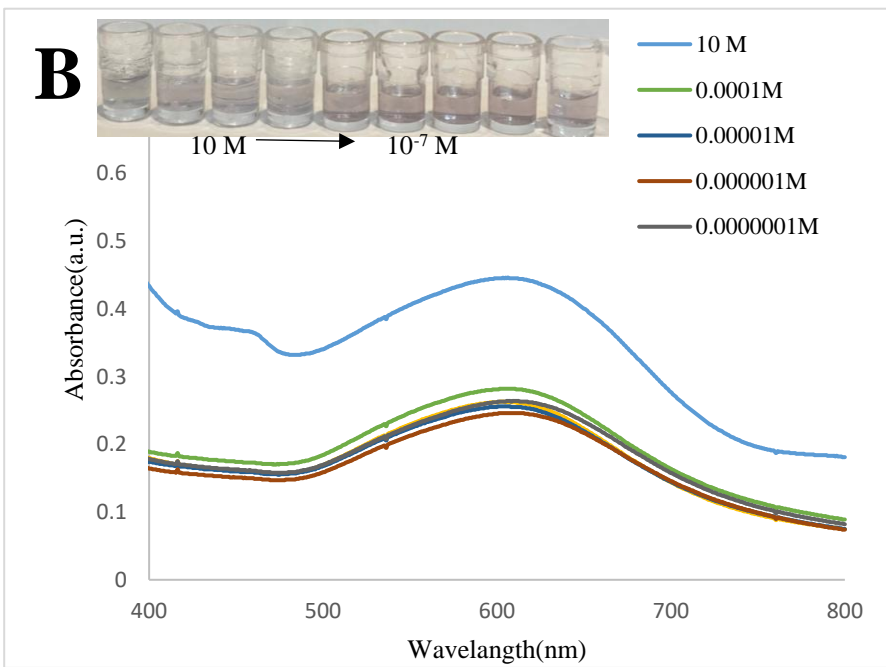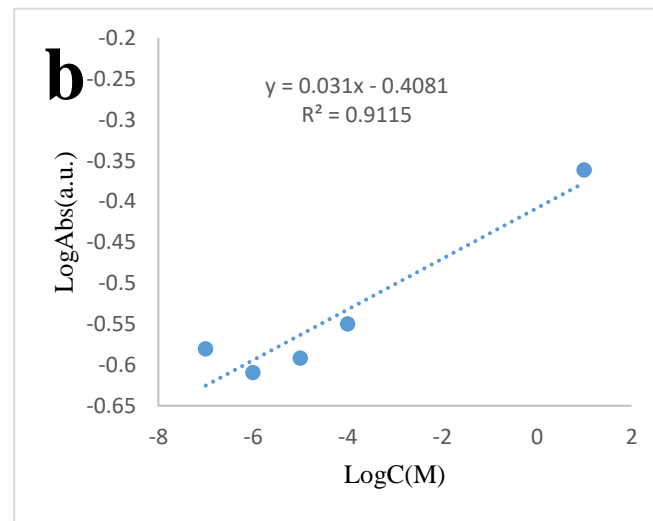

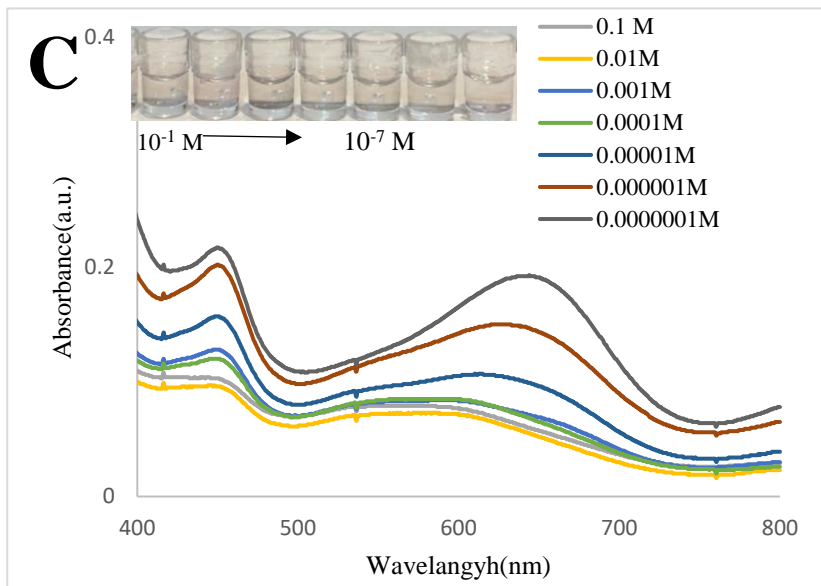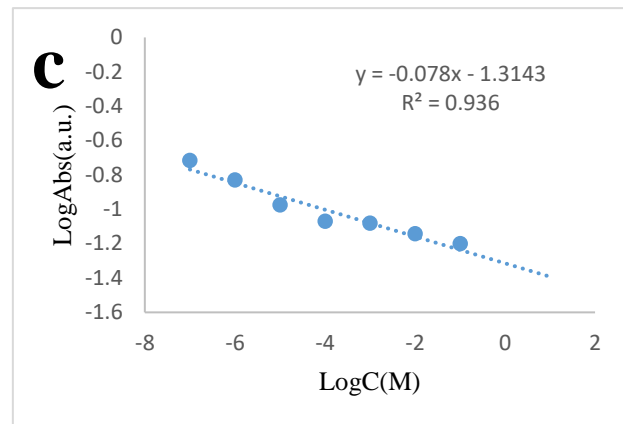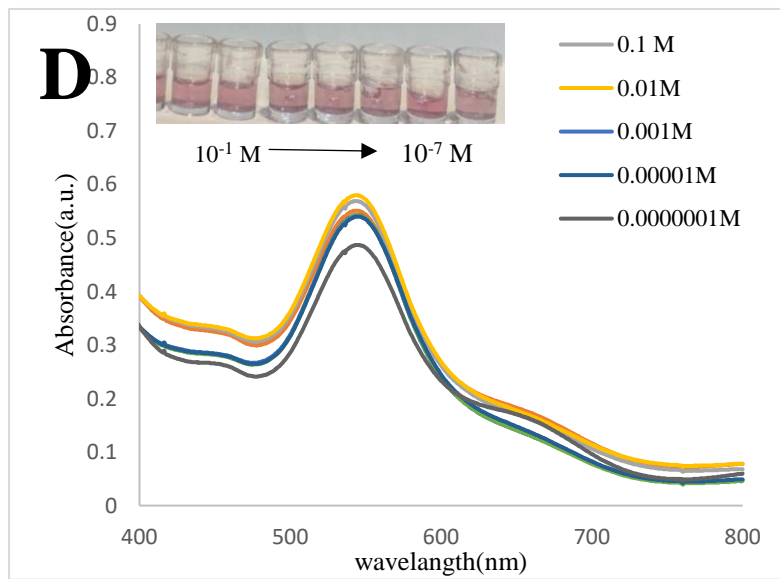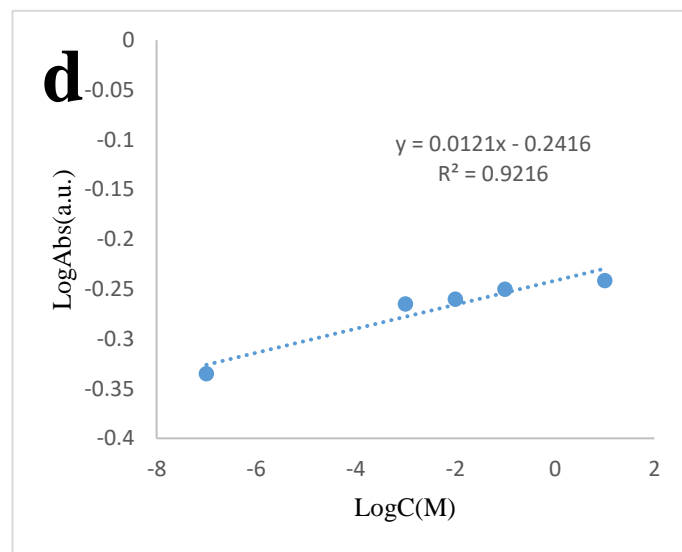

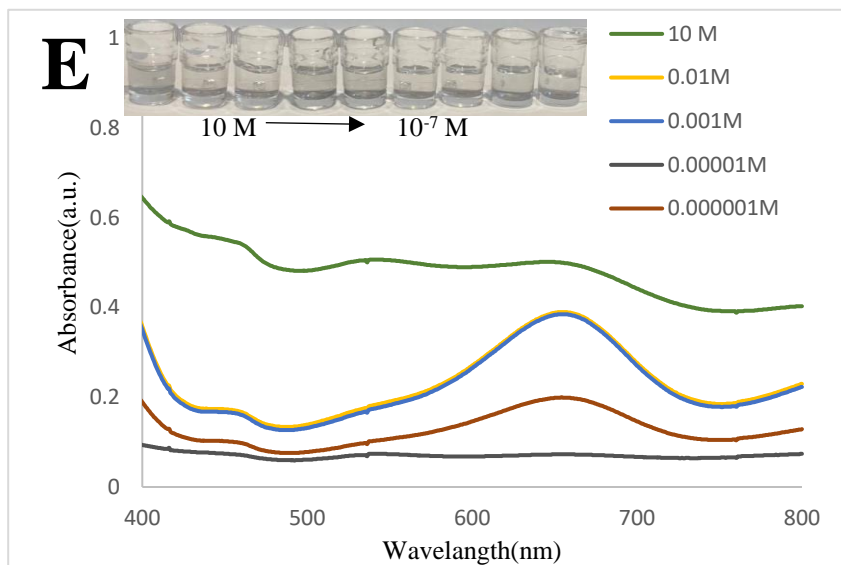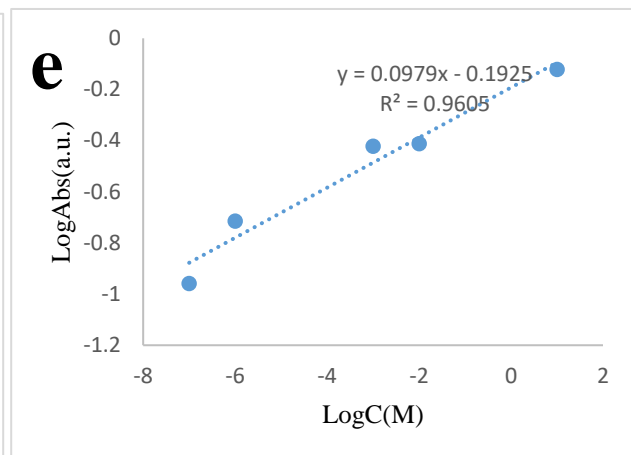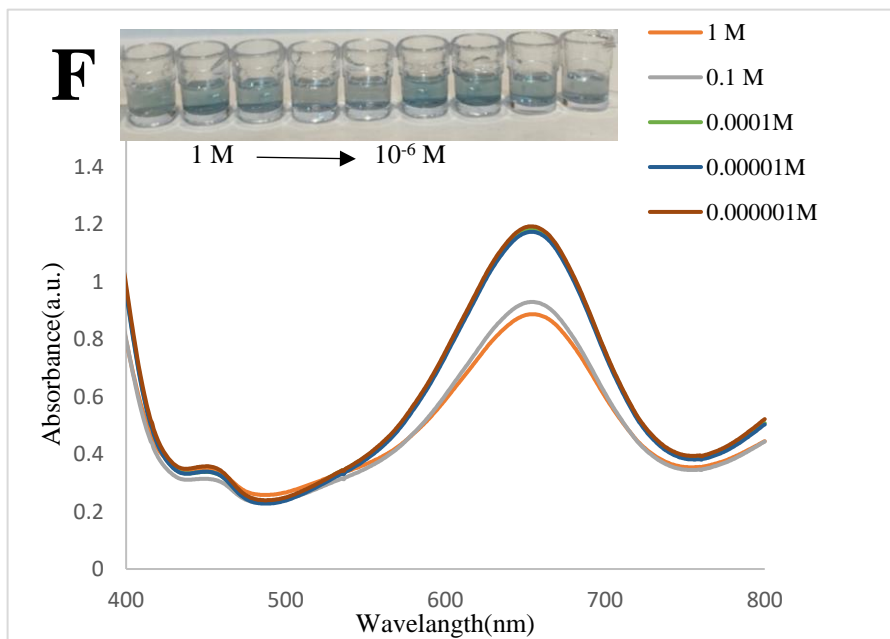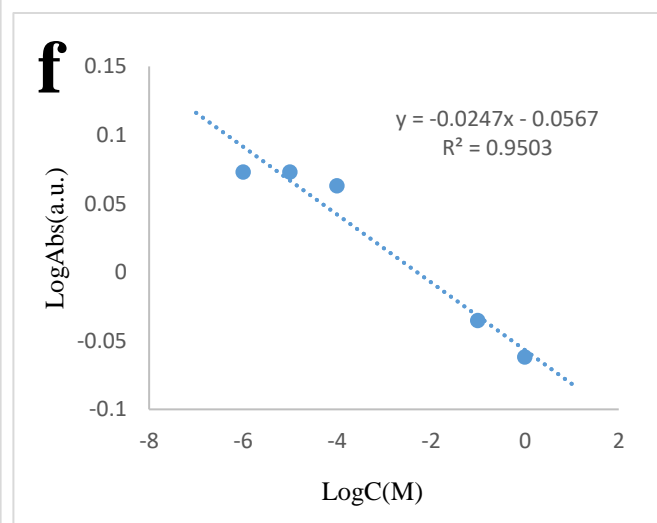

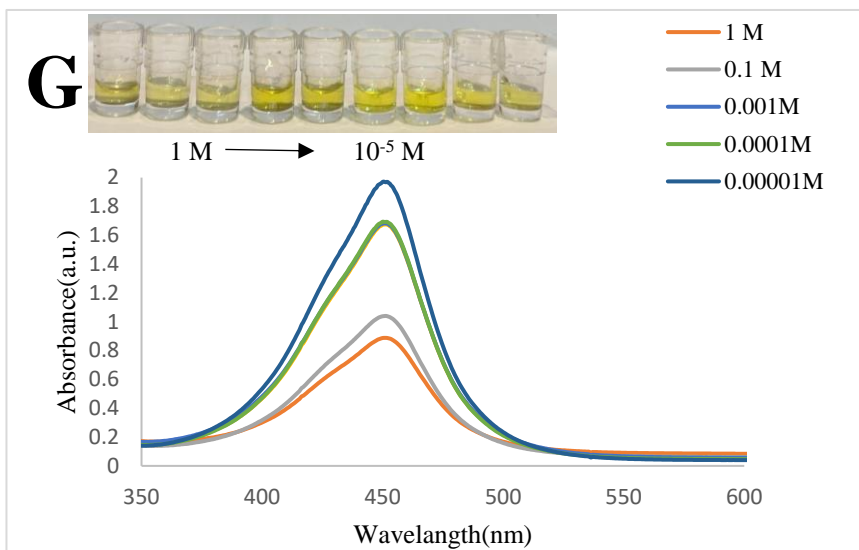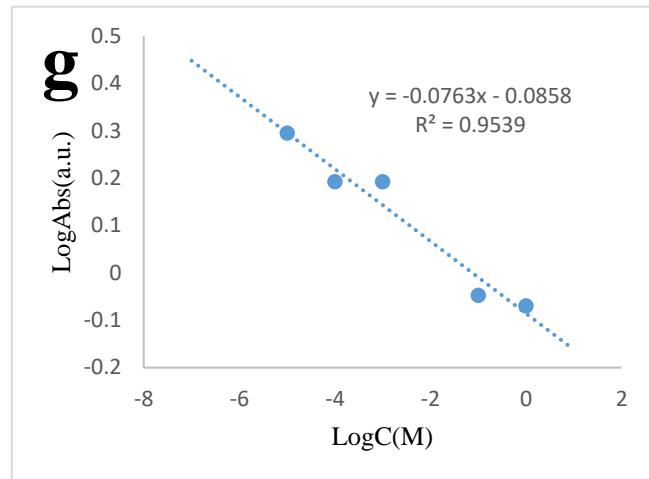

**Fig.S1. A-B-C-D-E-F-G)** Photographic image and UV-Vis spectra recorded from the reaction systems containing AuNPs-CysA/AuNPs-DDT/GNSs/GNSs(sediment)/AuNFs (ph.4.)/AuNFs (ph.6.15) and PCAuNPs, respectively with (TMB+H<sub>2</sub>O<sub>2</sub>) and different concentration of acetaldehyde (0.1-10<sup>7</sup> μM), **a-b-c-d-e-f-g)** Calibration curve of peak absorption versus concentration of acetaldehyde.

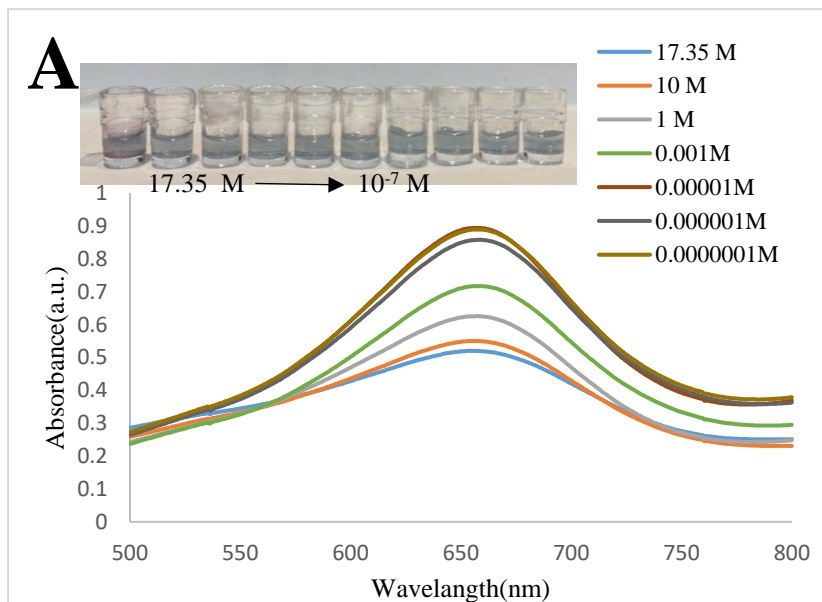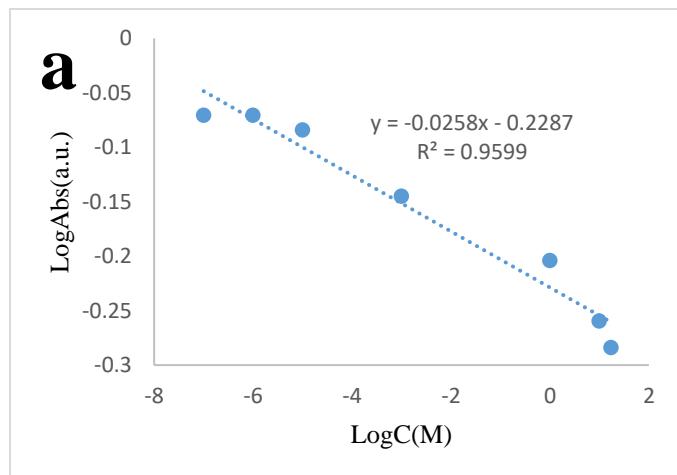

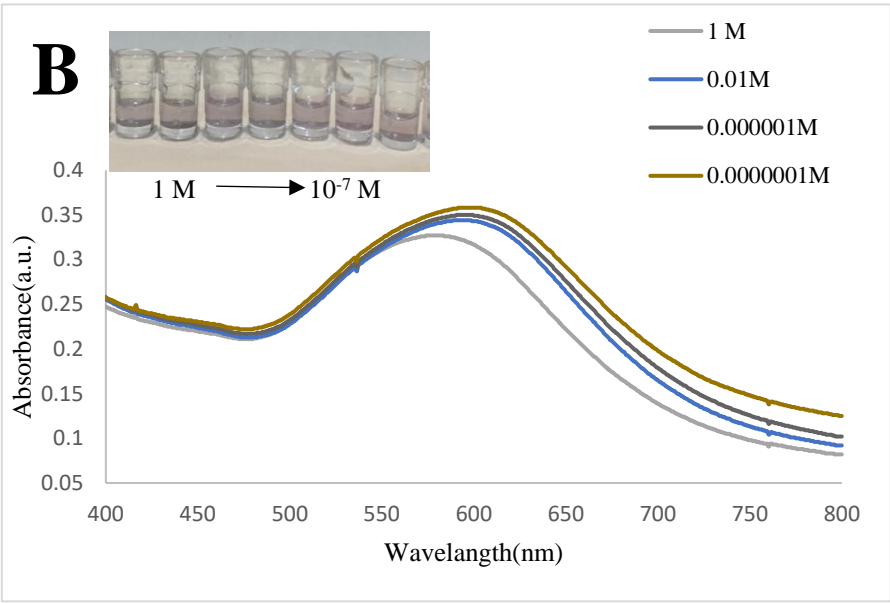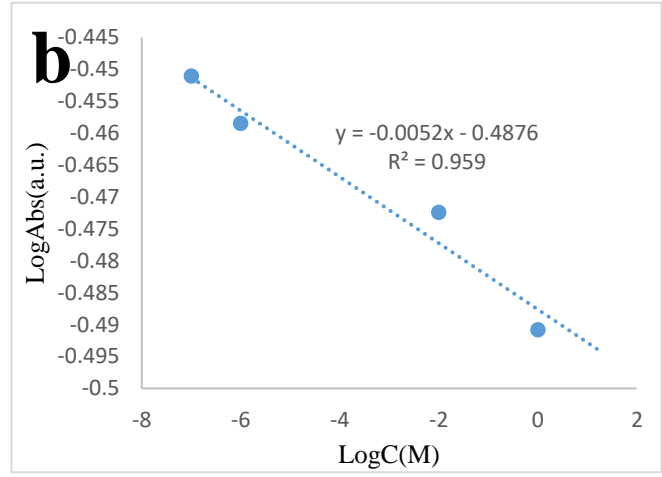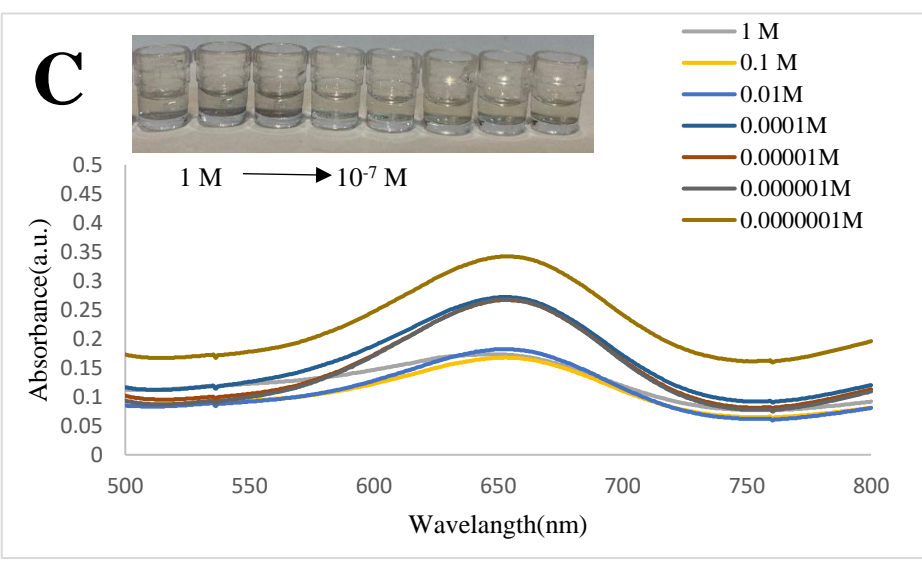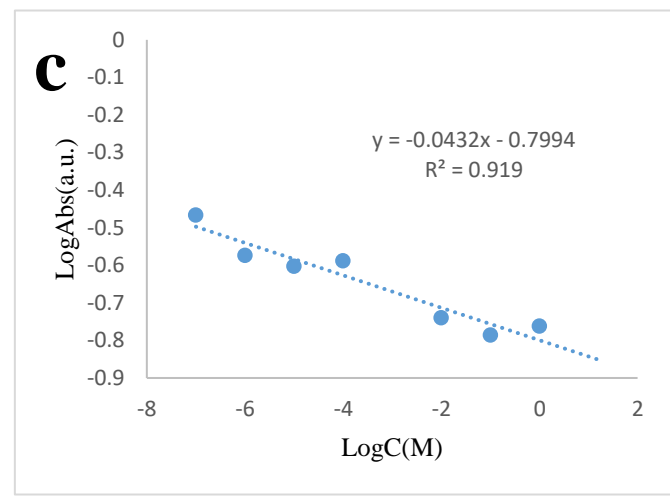

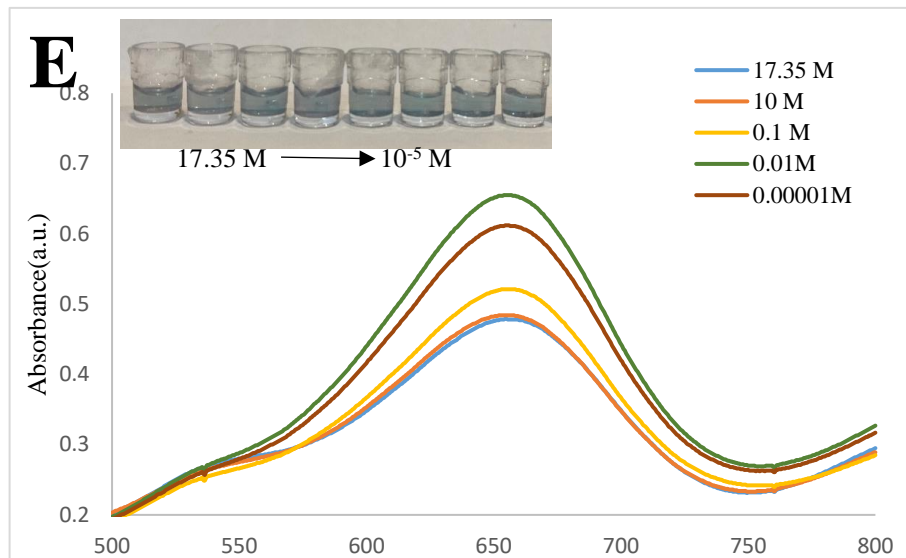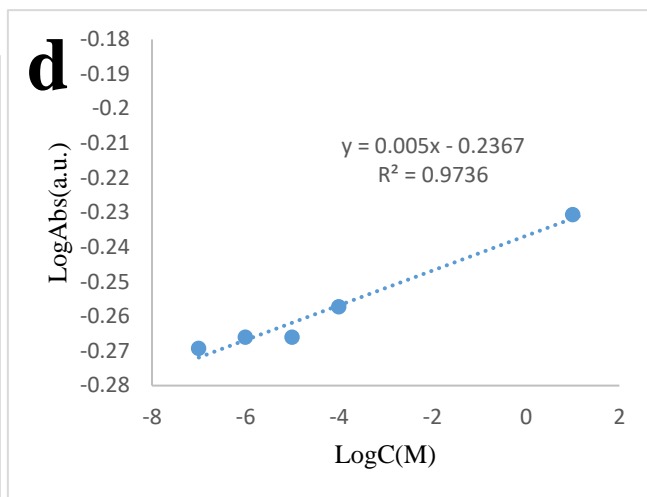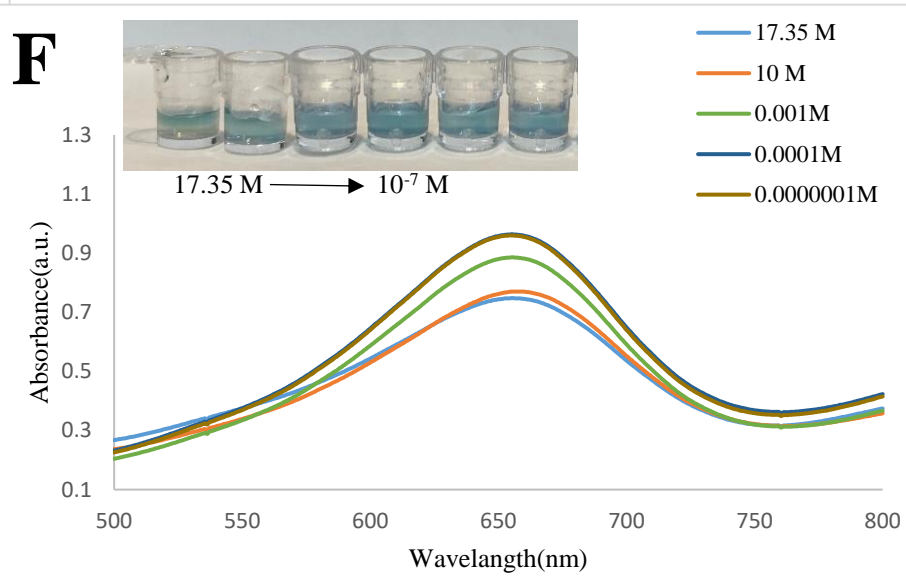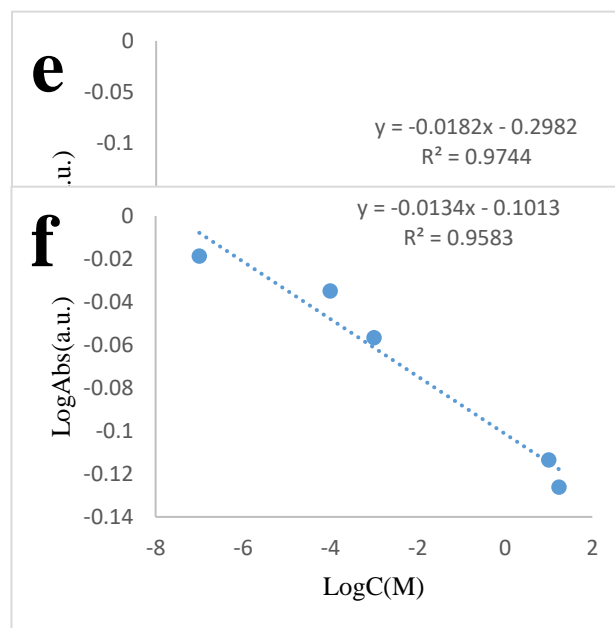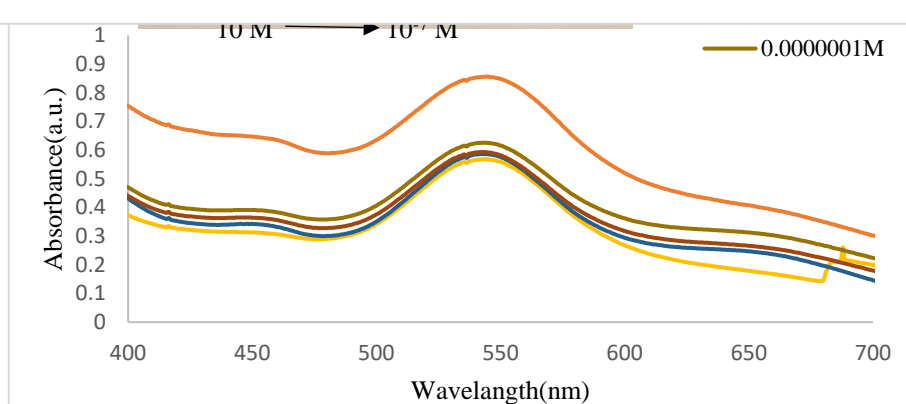

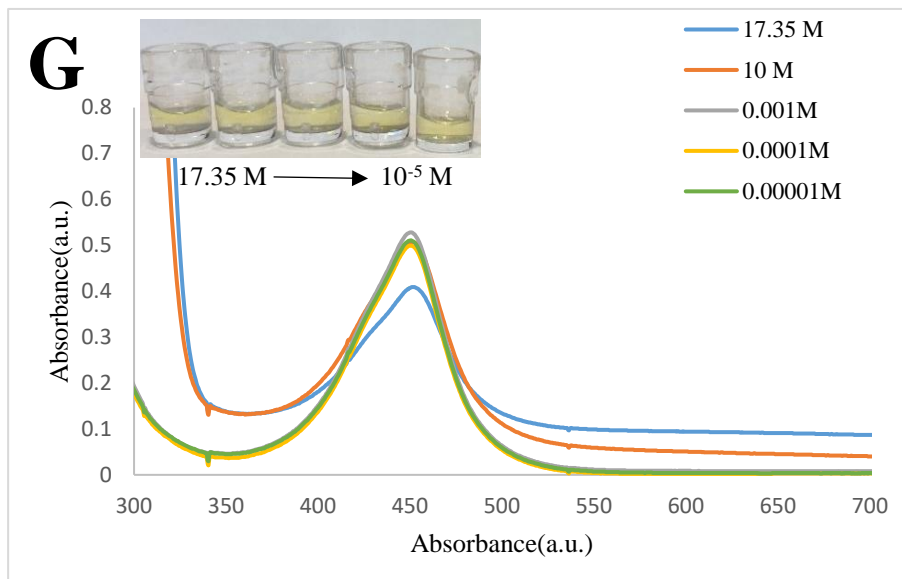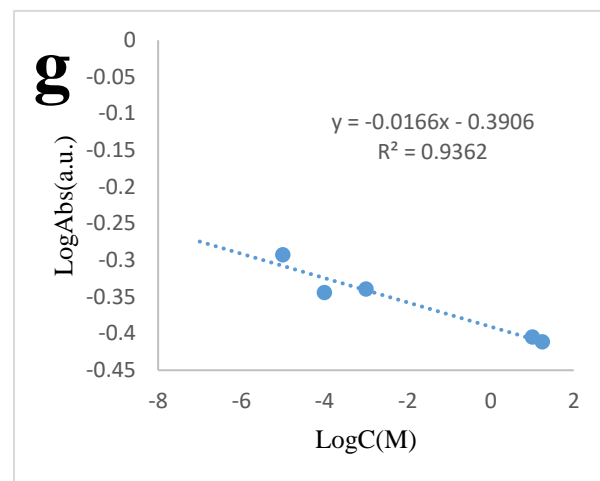

**Fig.S2. A-B-C-D-E-F-G)** UV-Vis absorption response for formaldehyde in different concentration concentrations ( $10^{-7}$  – 12.7M) and AuNPs (AuNPs-CysA/AuNPs-DDT/GNSs/GNSs(sediment)/AuNFs (ph.4.19)/AuNFs (ph.6.15) and Positively charged AuNPs, respectively) in human urine specimens  
**a-b-c-d-e-f-g)** Calibration curve of peak absorption versus concentration of acetaldehyde.



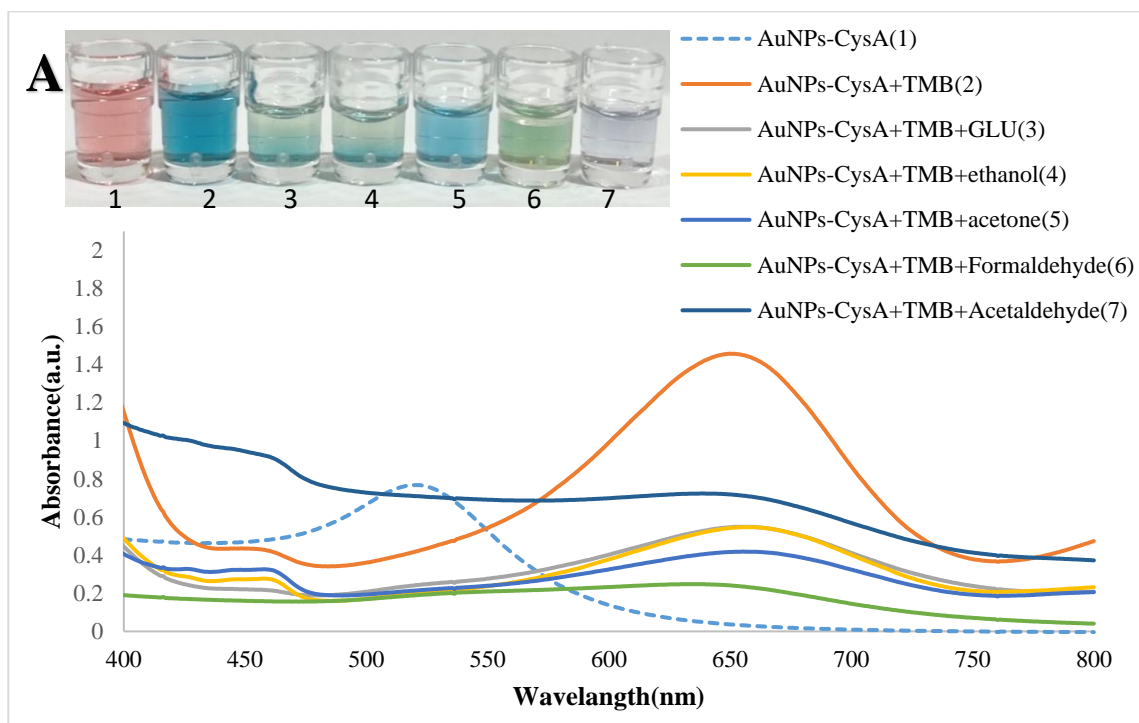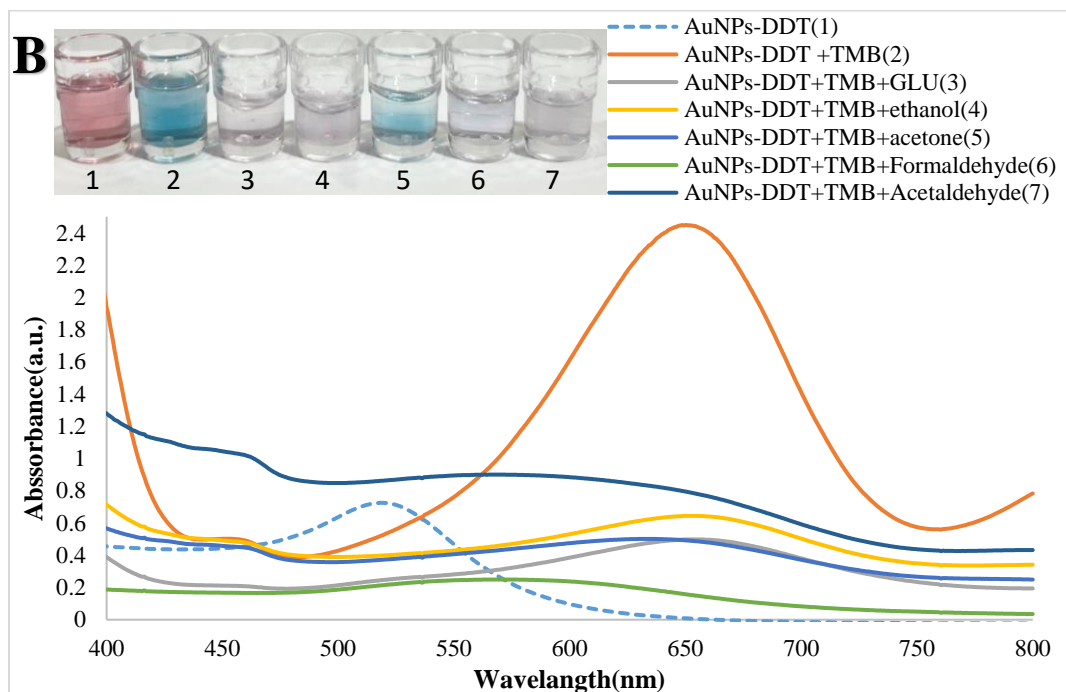

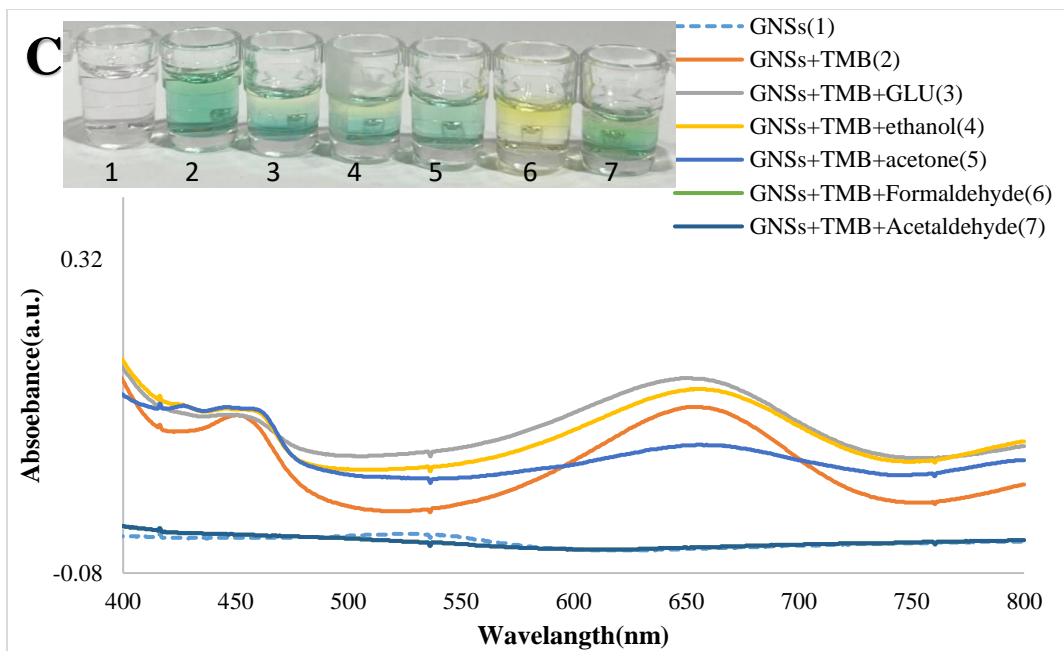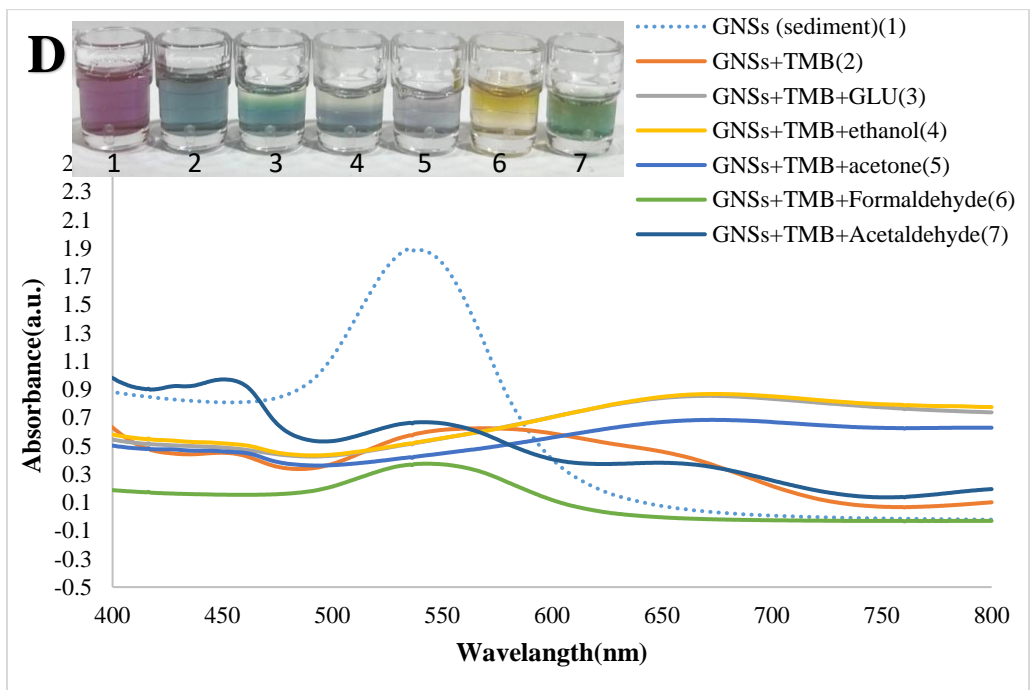

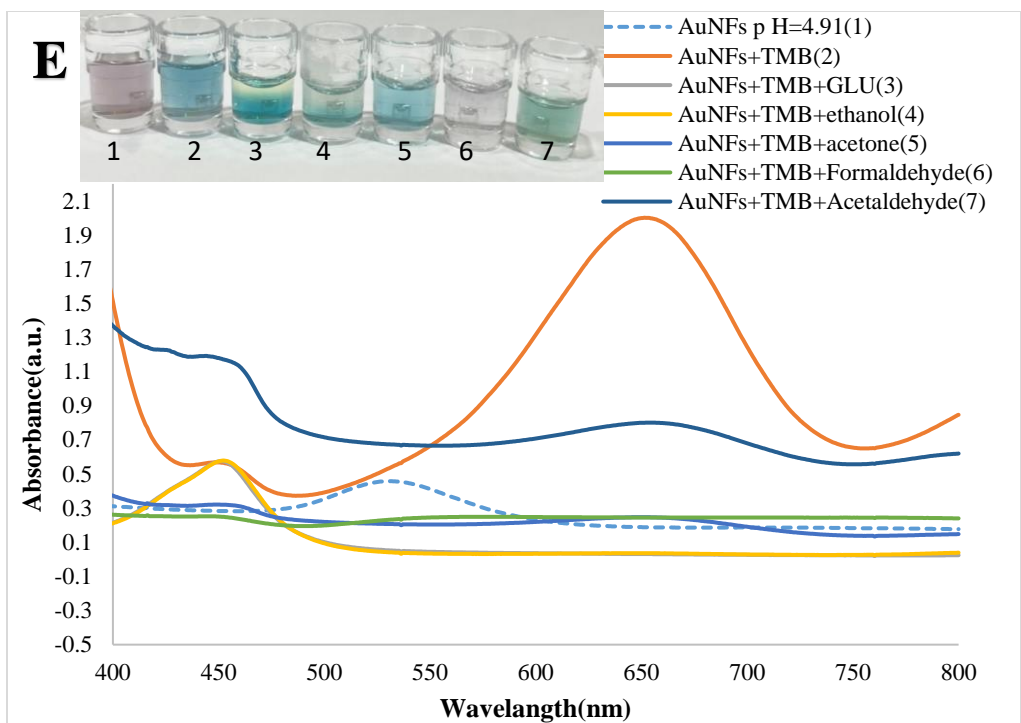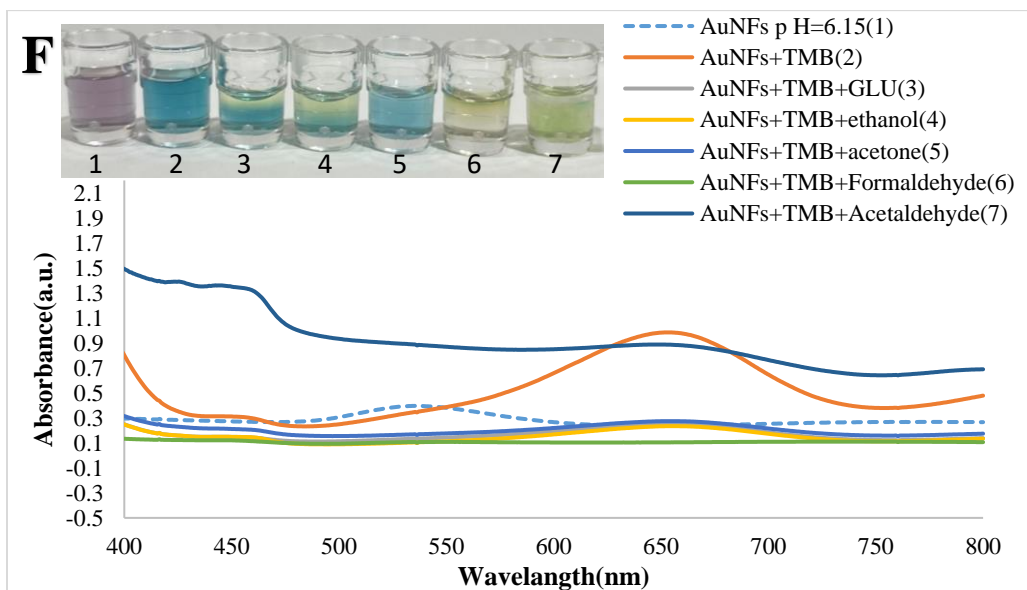

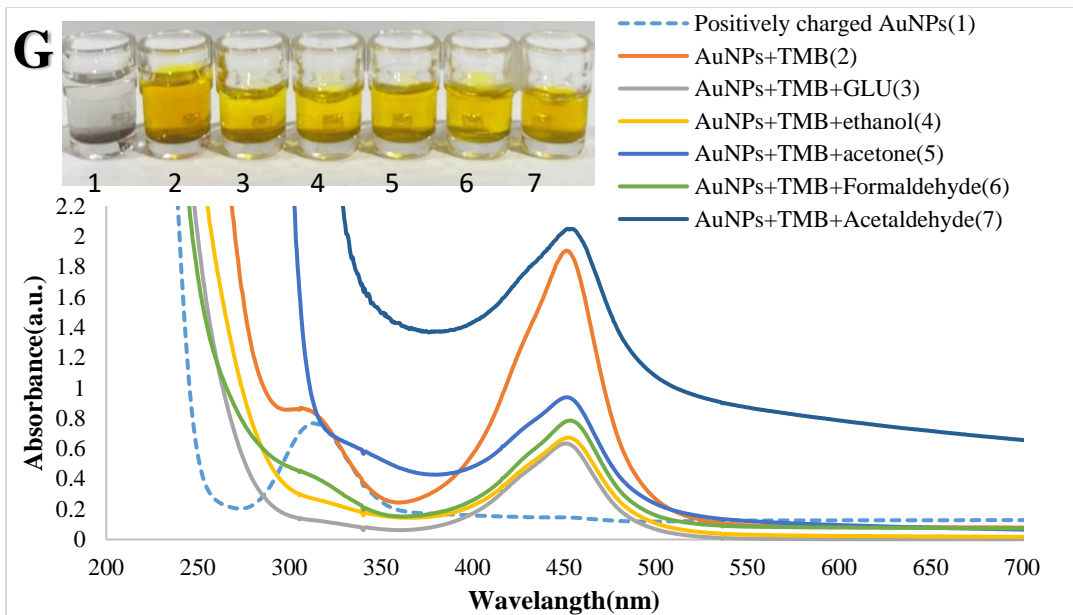

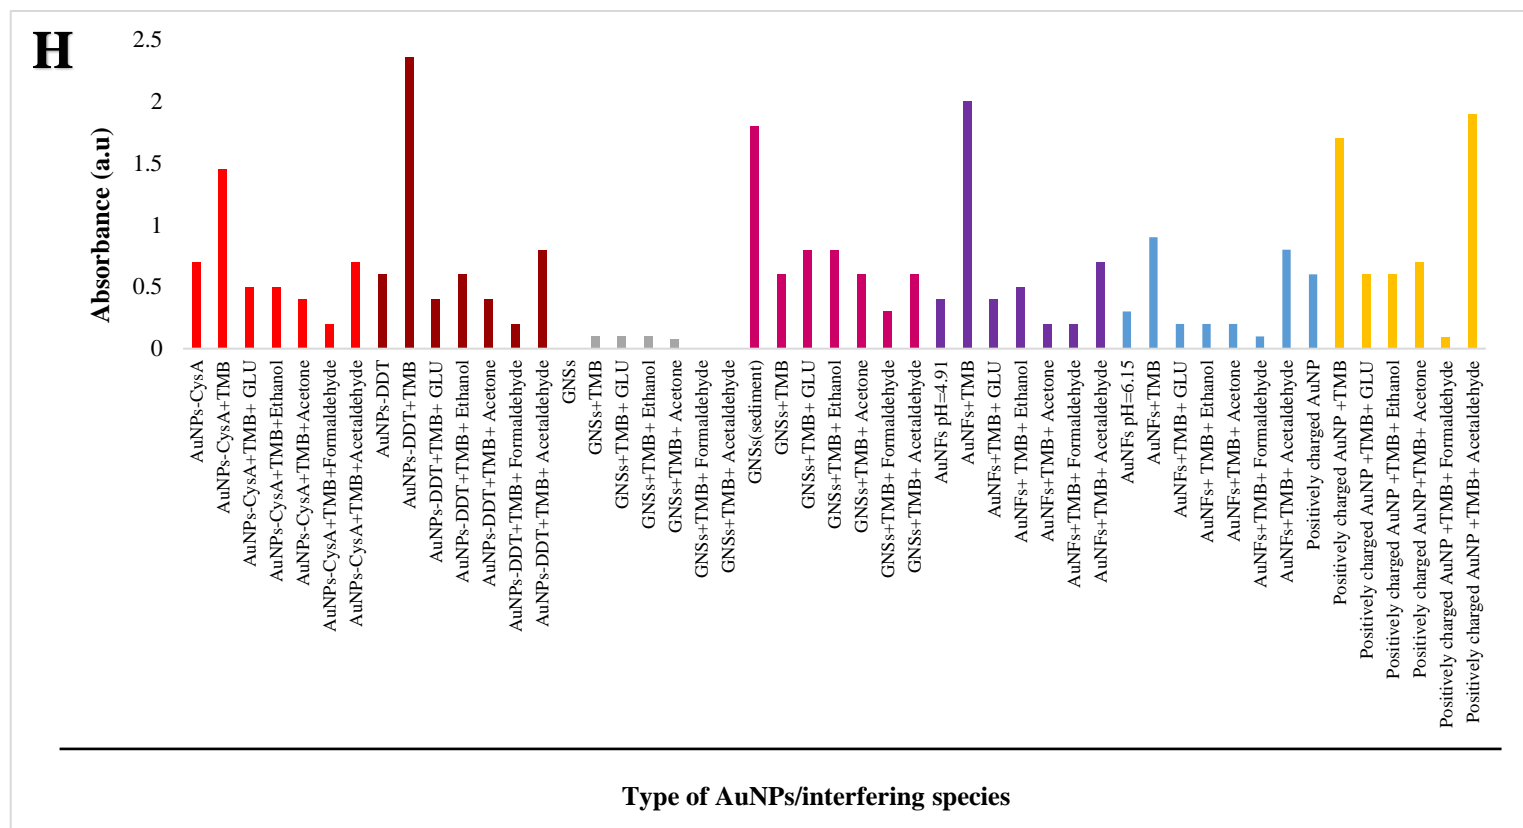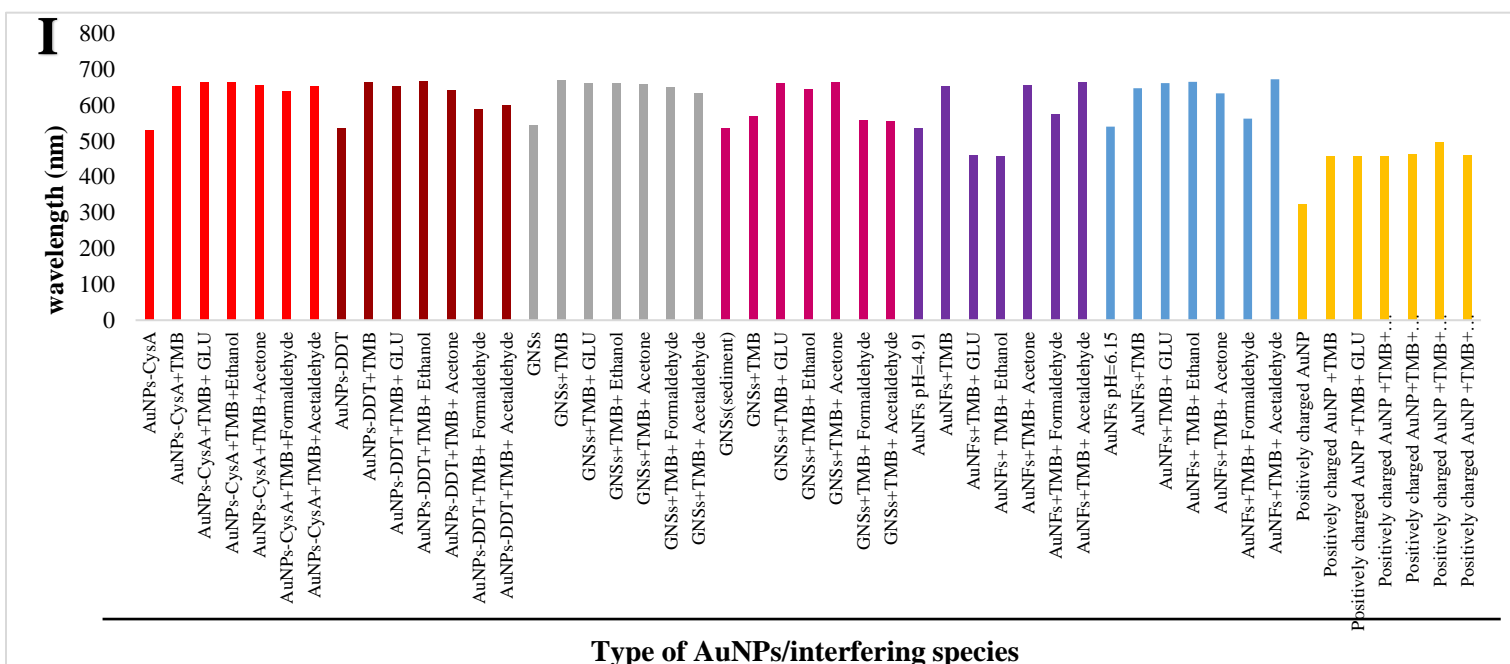

**Fig. S3. A-G)** UV-visible spectroscopy and colorimetric detection of the interaction of AuNPs with acetaldehyde in the presence of the TMB+H<sub>2</sub>O<sub>2</sub> solution and various interfering species. Histogram of **H)** absorbance intensity and **I)** absorbance wavelength.

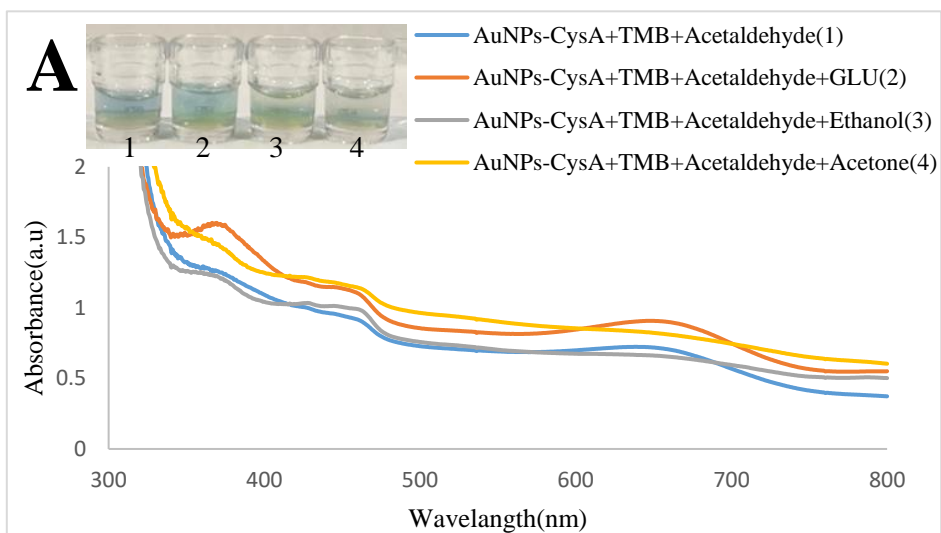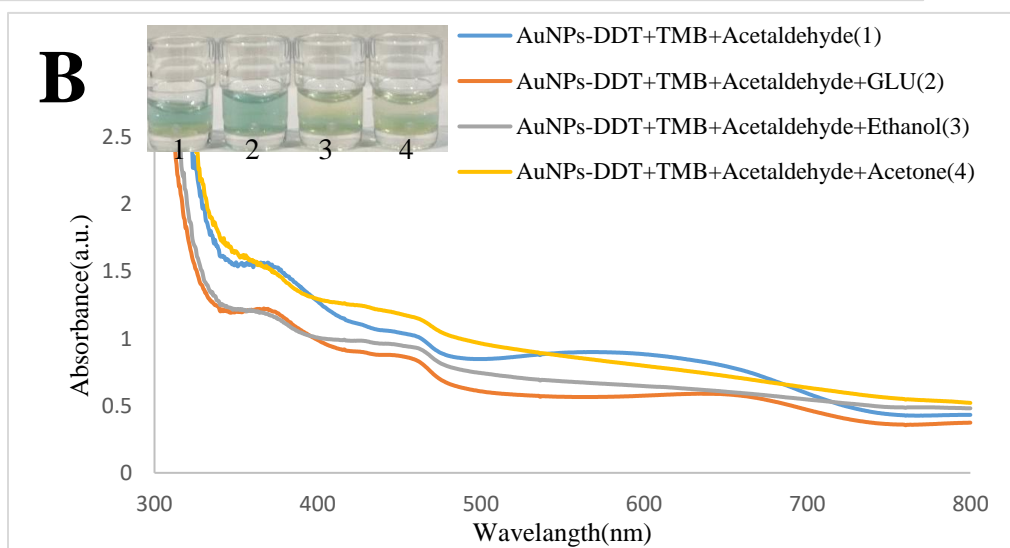

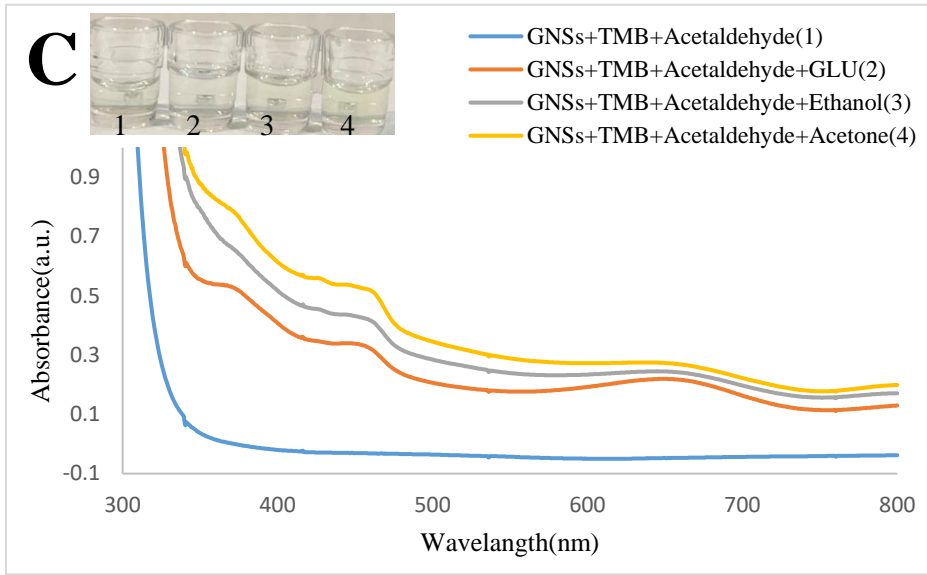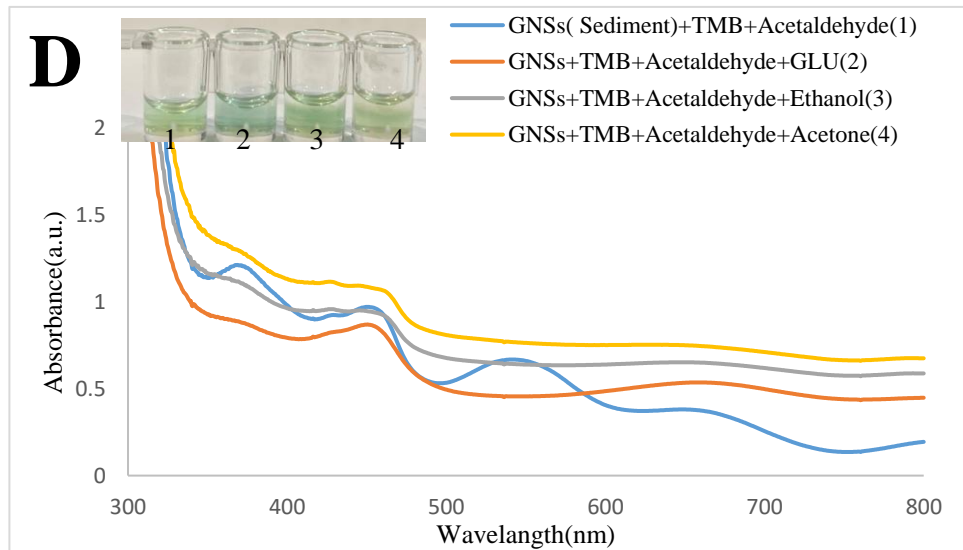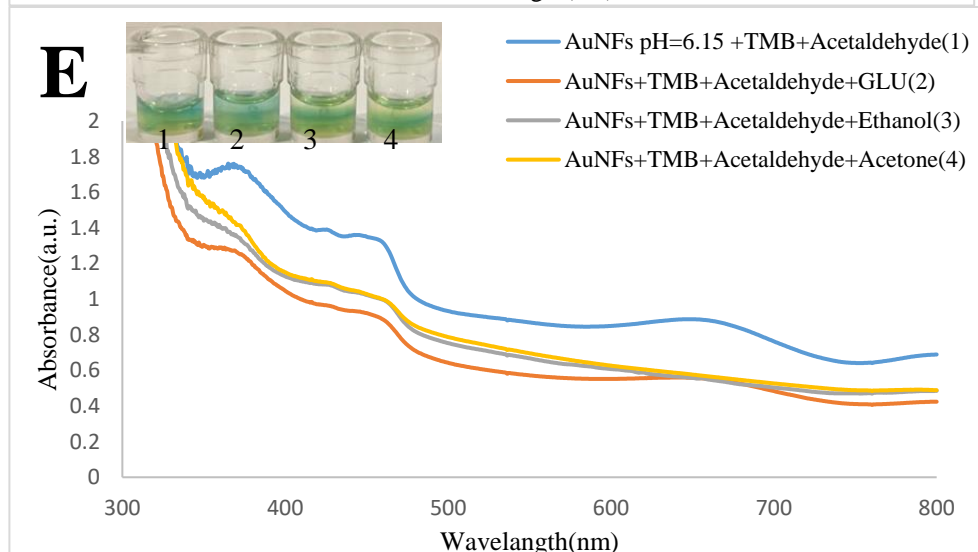

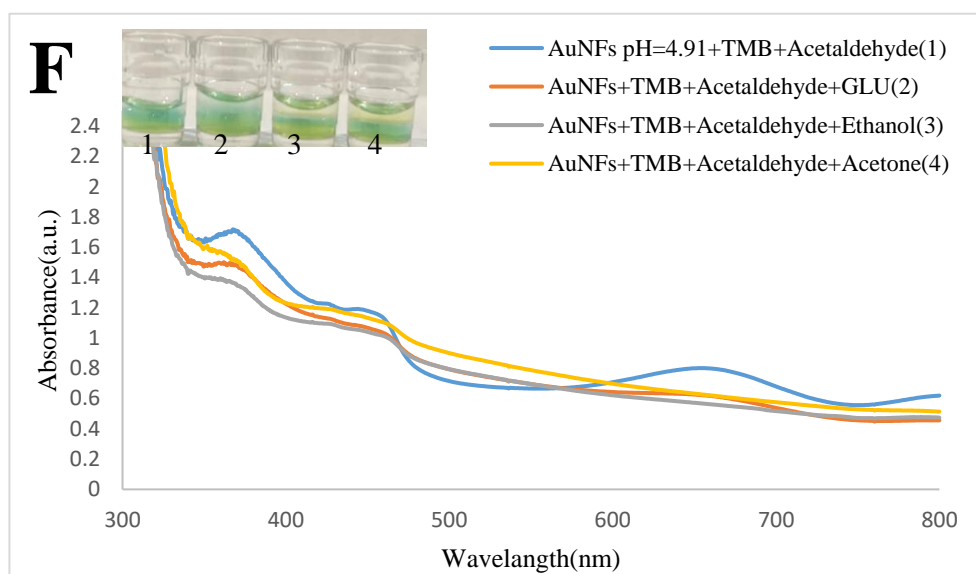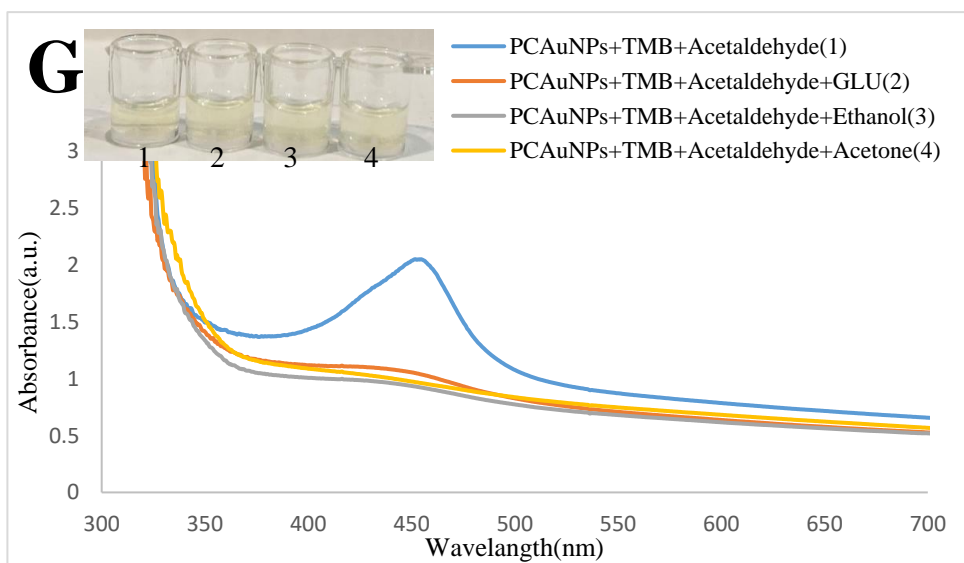



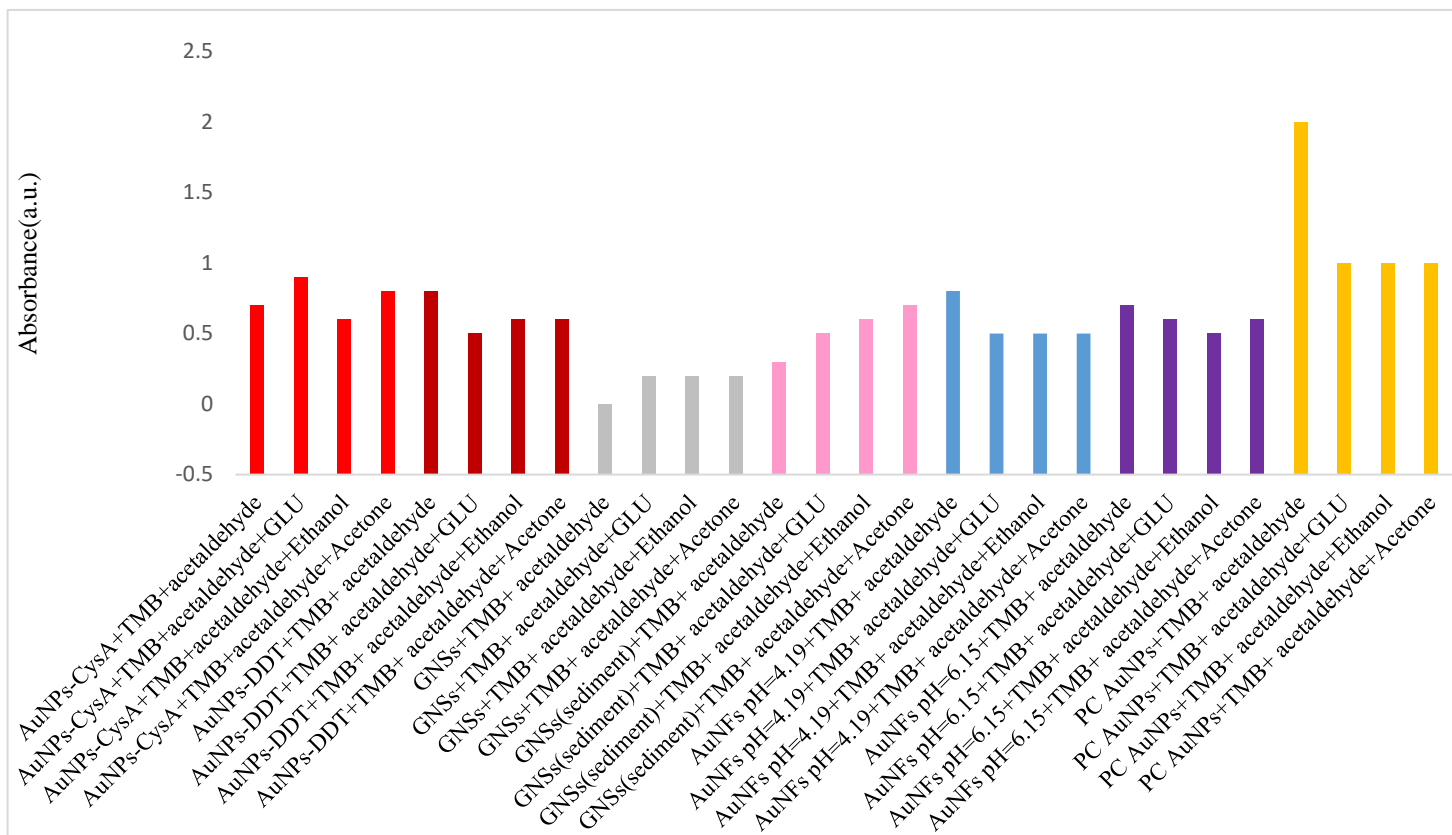

**Fig.S4. A-G)** UV-visible spectroscopy photographs examining the effects of interfering substances in solutions containing AuNPs, TMB, and acetaldehyde. **H)** Absorption using histogram.

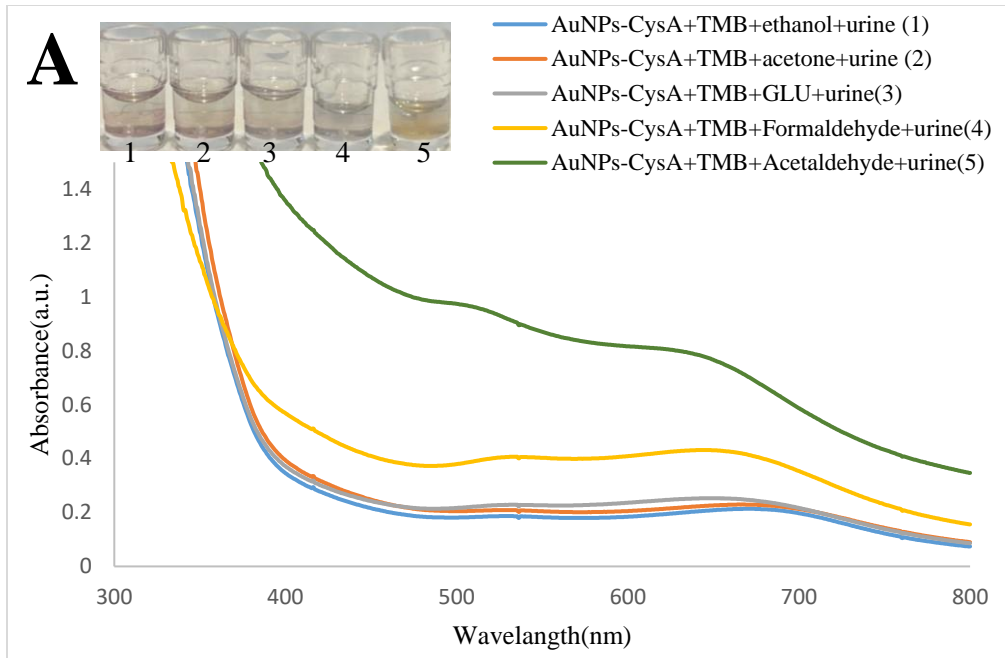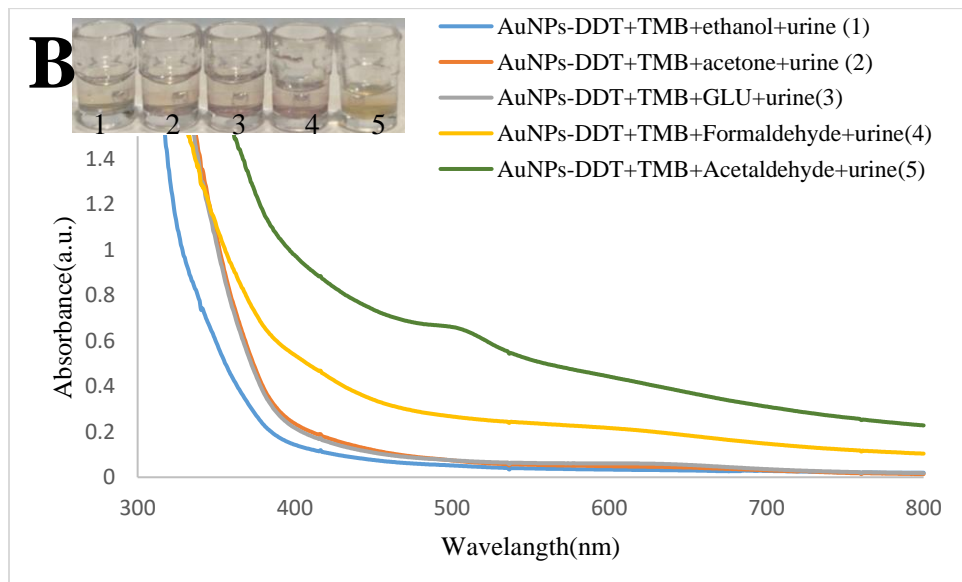

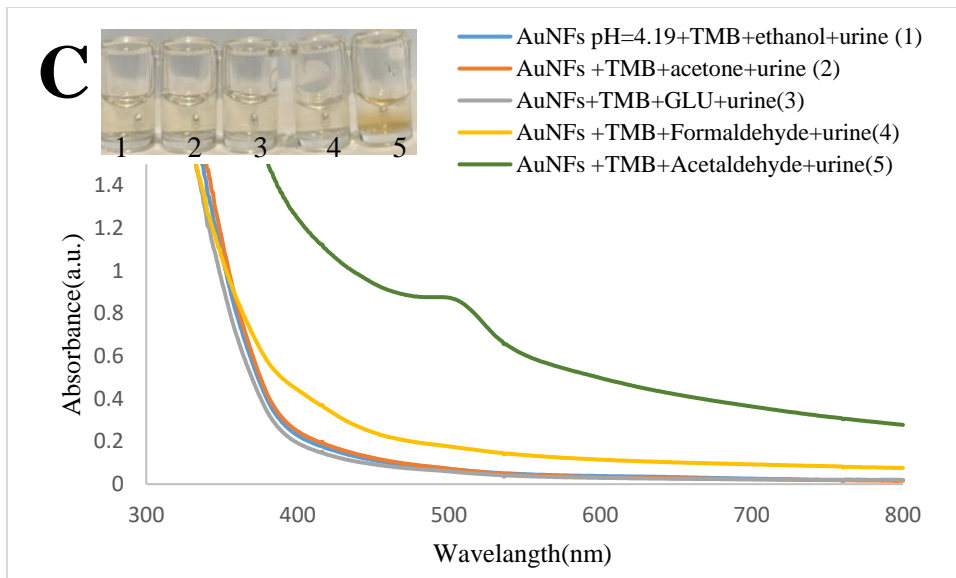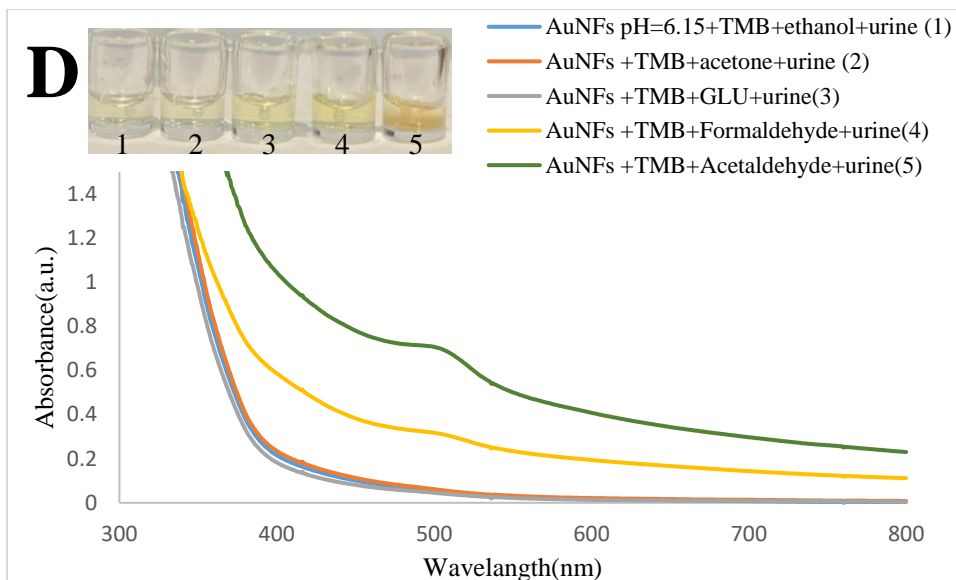

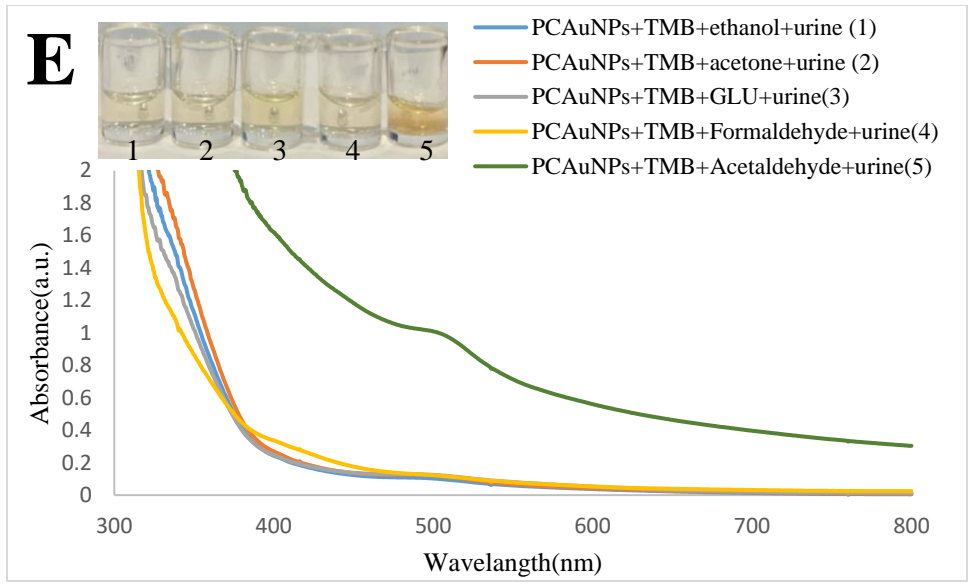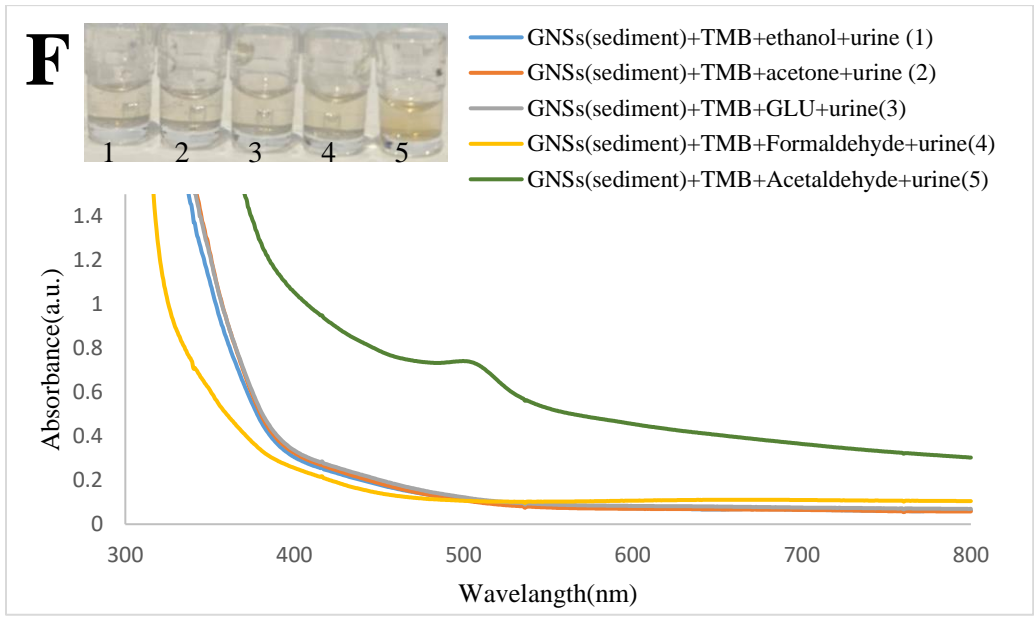

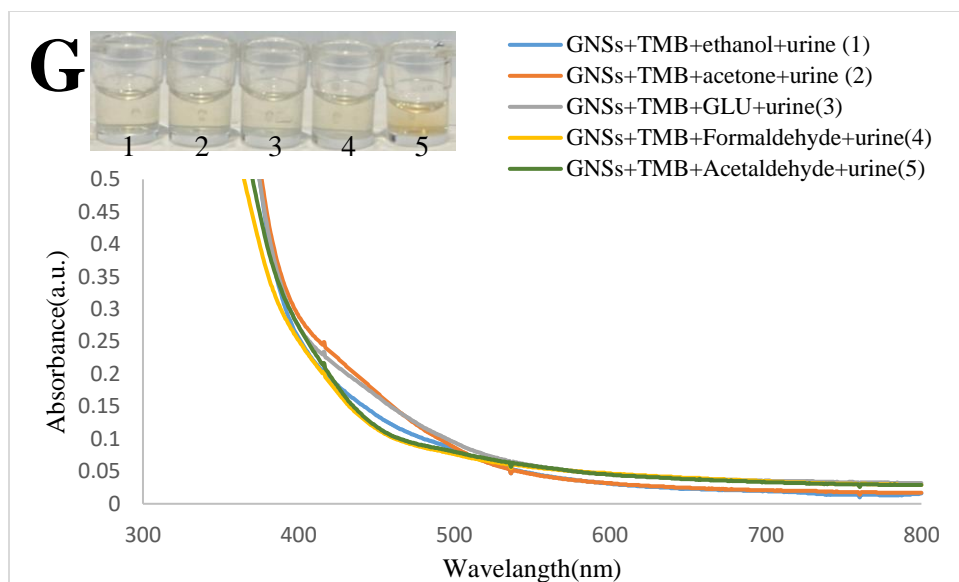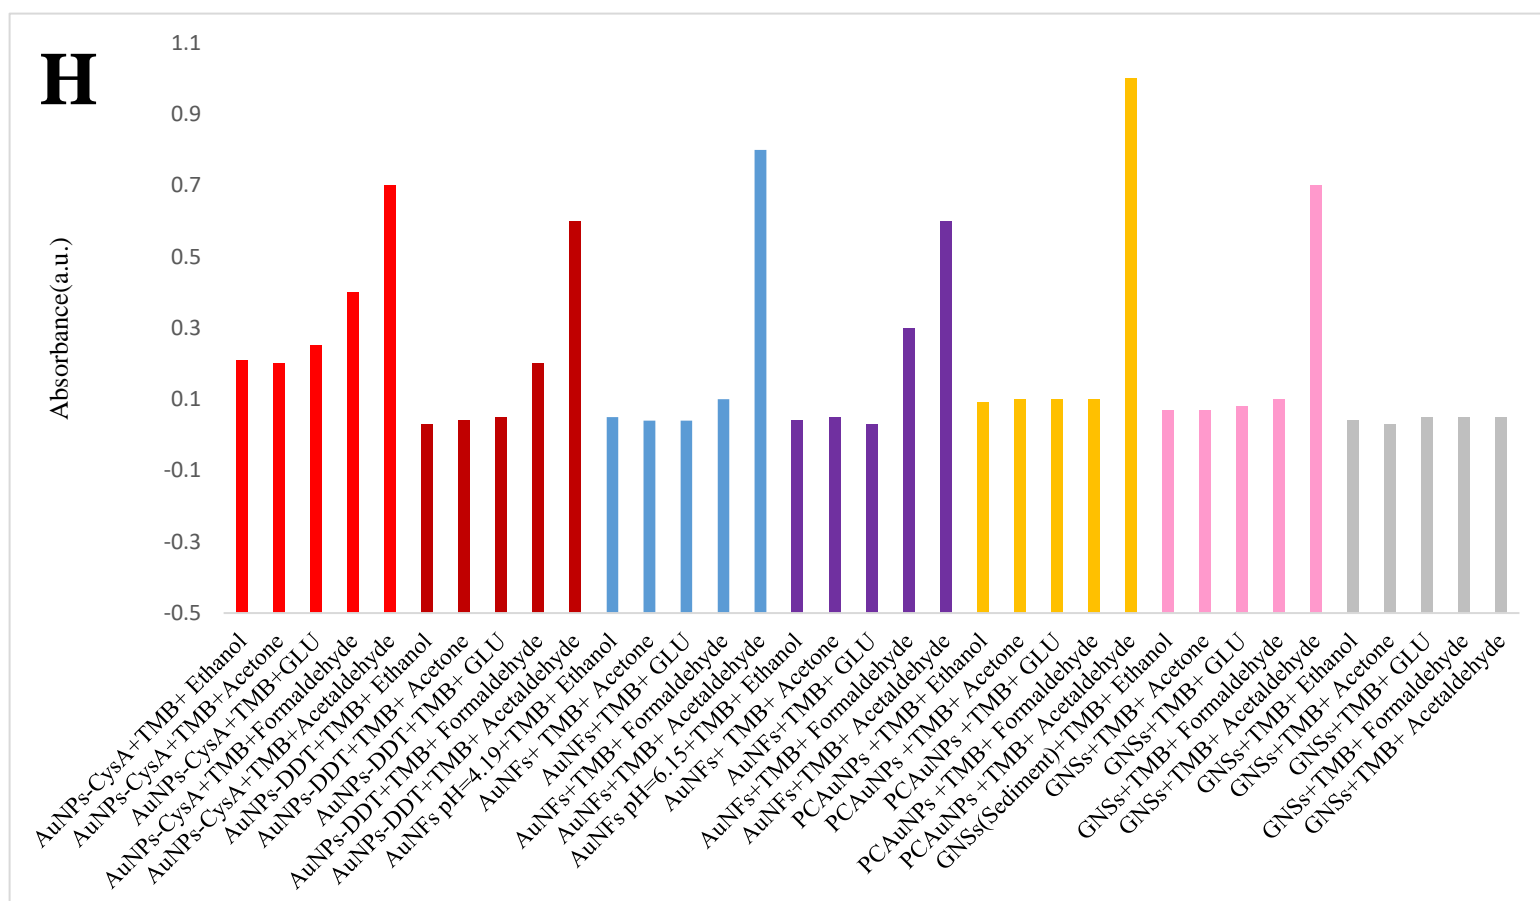

**Fig.S5. A-G)** UV-visible spectroscopy photographs examining the effects of interfering substances in solutions

containing AuNPs, TMB, and formaldehyde. **H)** Absorption using histogram

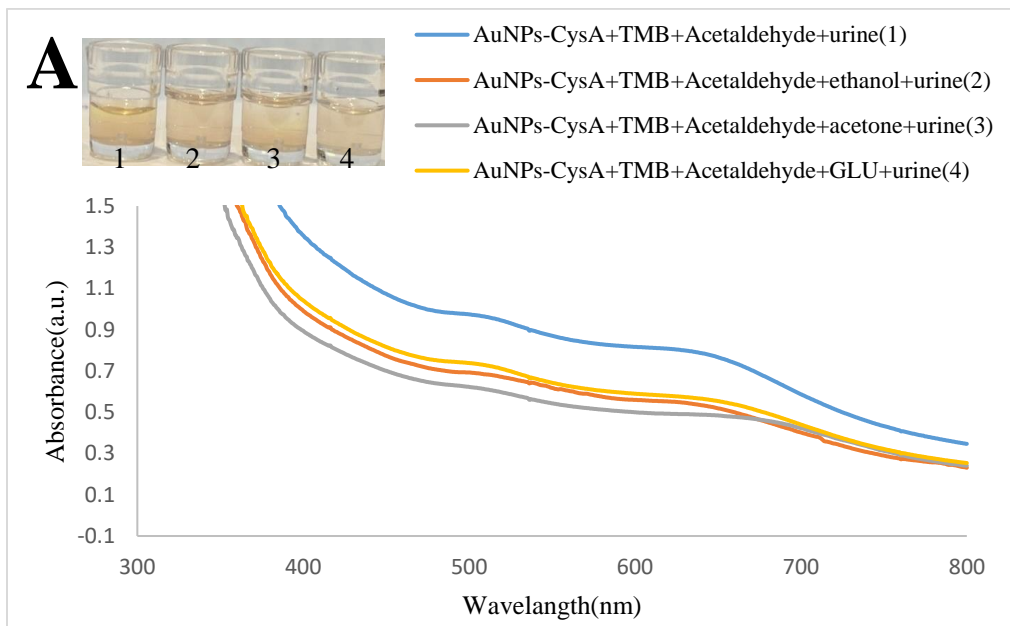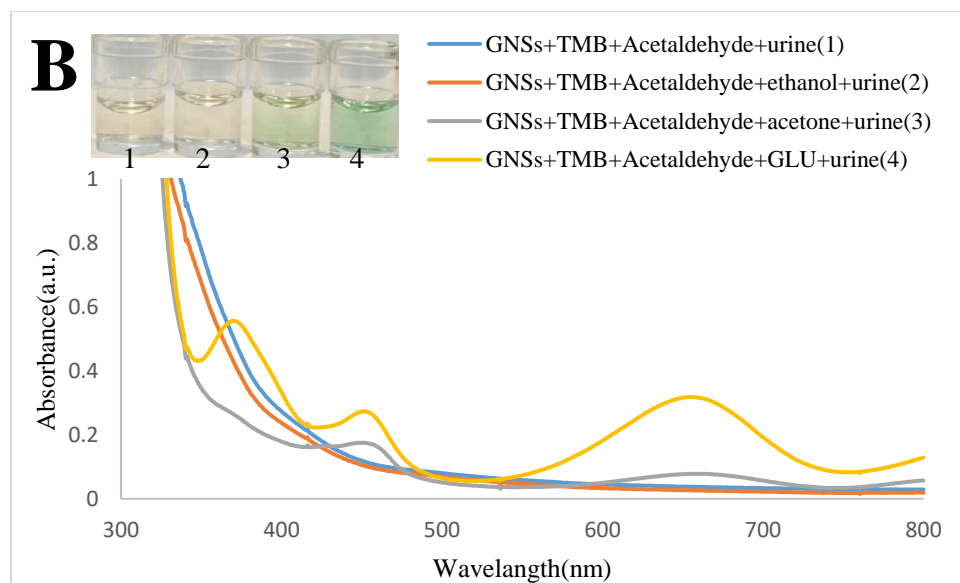

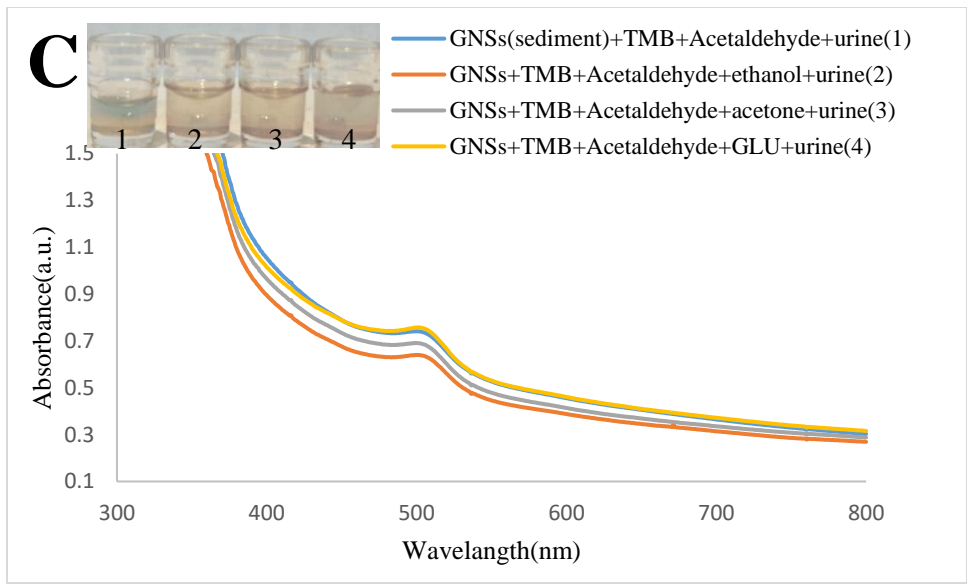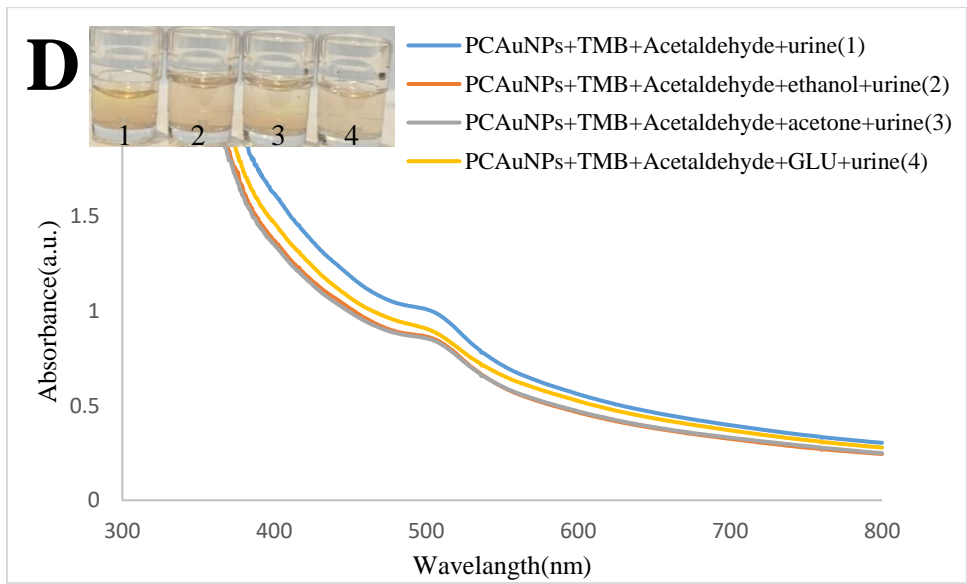

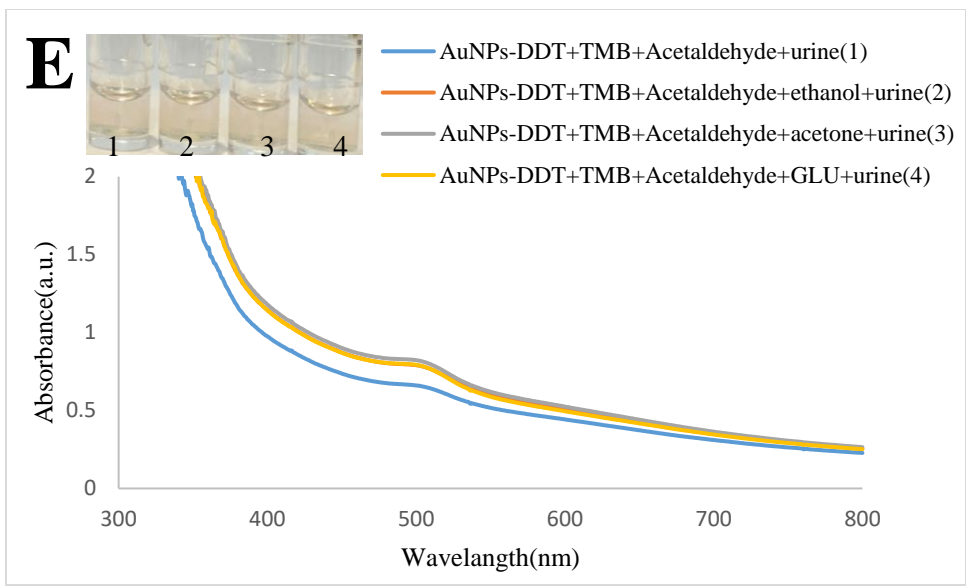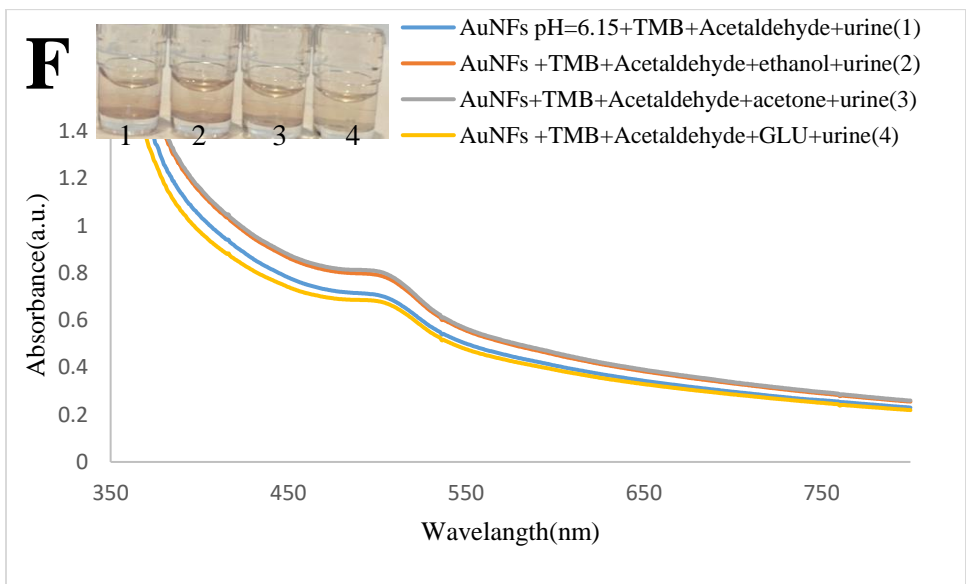



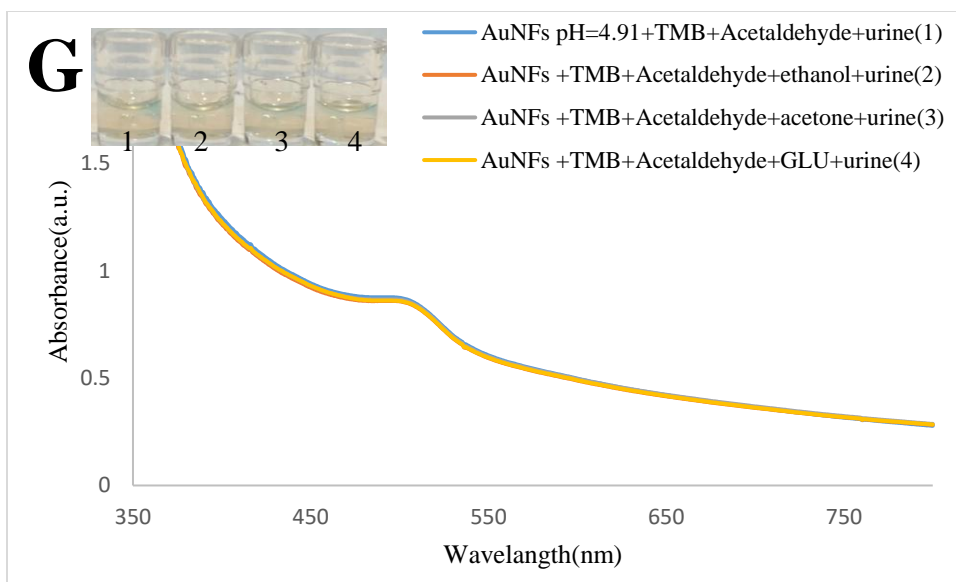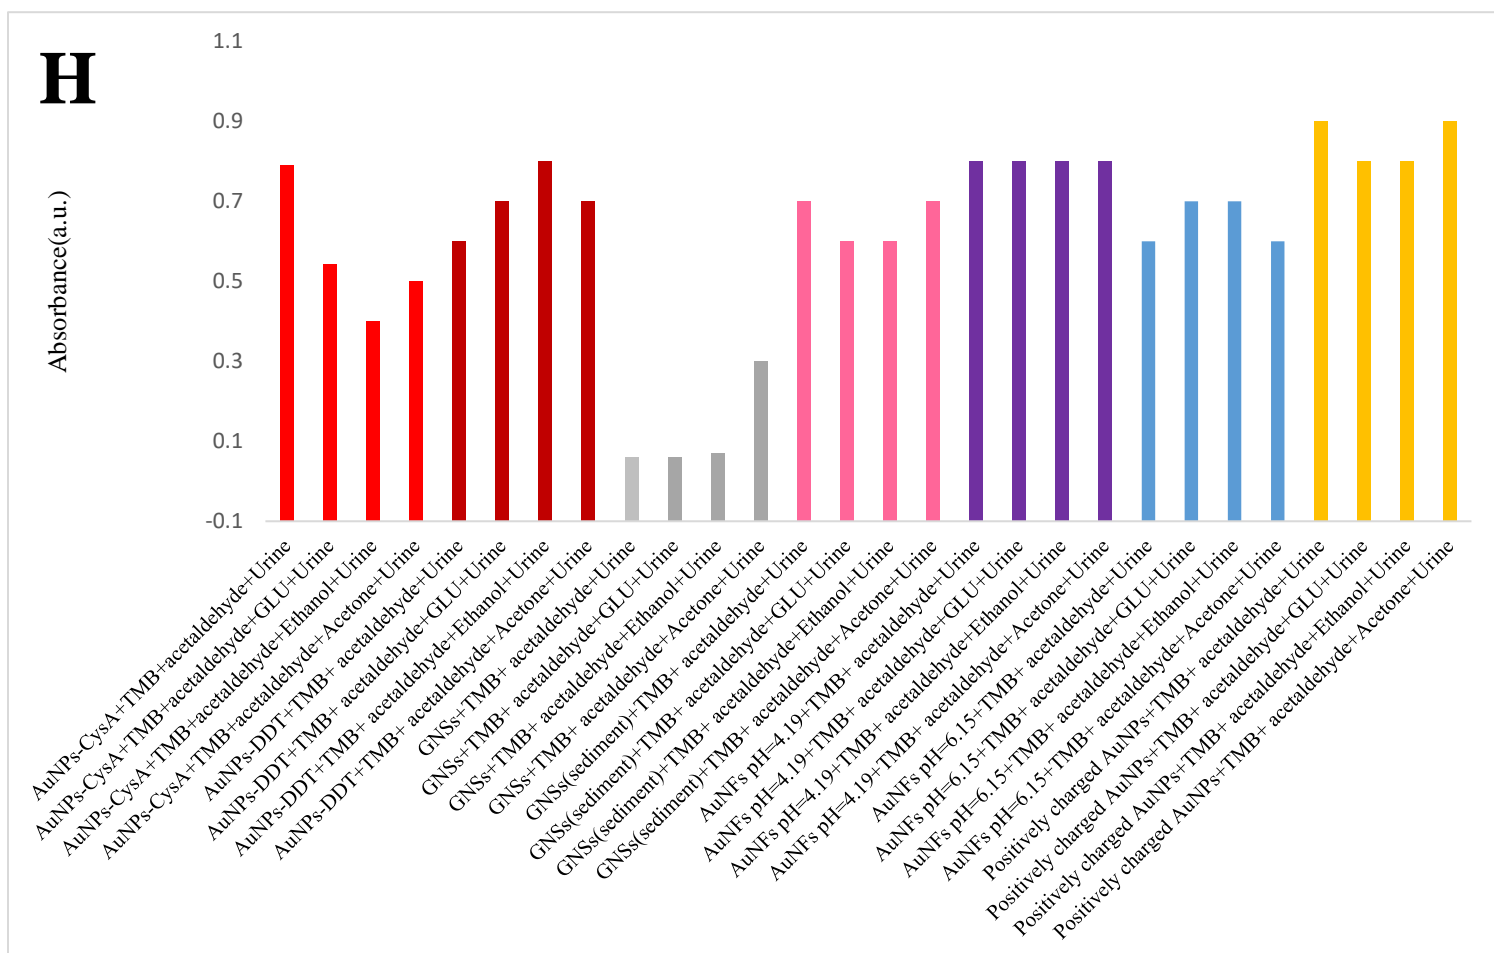

**Fig.S6. A-G** UV-visible spectroscopy photographs examining the effect of interfering substances in real samples

in solutions containing AuNPs, TMB, and acetaldehyde. **H**) Absorption using histogram.

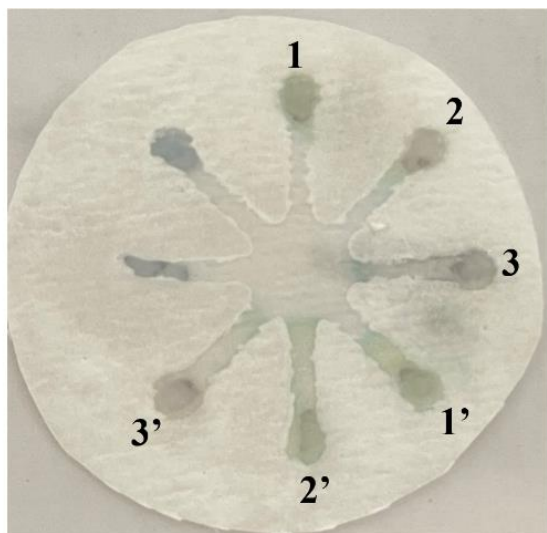

**Figure S7.** Photographic images demonstrating selectivity of prepared fiberglass microfluidic paper-based calorimetric chemosensor with AuNFs (pH 6.15) against various interferers: **1)** AuNFs + TMB + ethanol + acetaldehyde, **2)** AuNFs+ TMB + acetone + acetaldehyde, **3)** AuNFs + TMB + GLU + acetaldehyde, **1')** AuNFs + TMB + ethanol + acetaldehyde + Urine, **2')** AuNFs + TMB + acetone + acetaldehyde + Urine, **3')** AuNFs + TMB + GLU + acetaldehyde + Urine.
